# Supplementary material for: Health equity audits: a systematic review of the effectiveness
Source: PubMed Central journal article supplement (PMC8587574; doi:10.1136/bmjopen-2021-053392), 2021-11-11
Supplement: bmjopen-2021-053392.draft_revisions.pdf [file bmjopen-2021-053392.draft_revisions.pdf]

# BMJ Open

BMJ Open is committed to open peer review. As part of this commitment we make the peer review history of every article we publish publicly available.

When an article is published we post the peer reviewers' comments and the authors' responses online. We also post the versions of the paper that were used during peer review. These are the versions that the peer review comments apply to.

The versions of the paper that follow are the versions that were submitted during the peer review process. They are not the versions of record or the final published versions. They should not be cited or distributed as the published version of this manuscript.

BMJ Open is an open access journal and the full, final, typeset and author-corrected version of record of the manuscript is available on our site with no access controls, subscription charges or pay-per-view fees (<http://bmjopen.bmj.com>).

If you have any questions on BMJ Open's open peer review process please email [info.bmjopen@bmj.com](mailto:info.bmjopen@bmj.com)

# BMJ Open

## Systematic review of the effectiveness of Health Equity Audits: existing evidence and call for further research

|                               |                                                                                                                                                                                                                                                                                                                                                        |
|-------------------------------|--------------------------------------------------------------------------------------------------------------------------------------------------------------------------------------------------------------------------------------------------------------------------------------------------------------------------------------------------------|
| Journal:                      | <i>BMJ Open</i>                                                                                                                                                                                                                                                                                                                                        |
| Manuscript ID                 | bmjopen-2021-053392                                                                                                                                                                                                                                                                                                                                    |
| Article Type:                 | Original research                                                                                                                                                                                                                                                                                                                                      |
| Date Submitted by the Author: | 13-May-2021                                                                                                                                                                                                                                                                                                                                            |
| Complete List of Authors:     | van Daalen, Kim; University of Cambridge Department of Public Health and Primary Care, Cardiovascular Epidemiology Unit<br>Davey, Fiona; The University of Arizona Mel and Enid Zuckerman College of Public Health<br>Norman, Claire; Newcastle University, Population Health Sciences Institute<br>Ford, John; University of Cambridge, Public Health |
| Keywords:                     | PUBLIC HEALTH, Clinical audit < HEALTH SERVICES ADMINISTRATION & MANAGEMENT, EPIDEMIOLOGY                                                                                                                                                                                                                                                              |
|                               |                                                                                                                                                                                                                                                                                                                                                        |

SCHOLARONE™  
Manuscripts

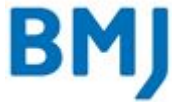

I, the Submitting Author has the right to grant and does grant on behalf of all authors of the Work (as defined in the below author licence), an exclusive licence and/or a non-exclusive licence for contributions from authors who are: i) UK Crown employees; ii) where BMJ has agreed a CC-BY licence shall apply, and/or iii) in accordance with the terms applicable for US Federal Government officers or employees acting as part of their official duties; on a worldwide, perpetual, irrevocable, royalty-free basis to BMJ Publishing Group Ltd ("BMJ") its licensees and where the relevant Journal is co-owned by BMJ to the co-owners of the Journal, to publish the Work in this journal and any other BMJ products and to exploit all rights, as set out in our [licence](#).

The Submitting Author accepts and understands that any supply made under these terms is made by BMJ to the Submitting Author unless you are acting as an employee on behalf of your employer or a postgraduate student of an affiliated institution which is paying any applicable article publishing charge ("APC") for Open Access articles. Where the Submitting Author wishes to make the Work available on an Open Access basis (and intends to pay the relevant APC), the terms of reuse of such Open Access shall be governed by a Creative Commons licence – details of these licences and which [Creative Commons](#) licence will apply to this Work are set out in our licence referred to above.

Other than as permitted in any relevant BMJ Author's Self Archiving Policies, I confirm this Work has not been accepted for publication elsewhere, is not being considered for publication elsewhere and does not duplicate material already published. I confirm all authors consent to publication of this Work and authorise the granting of this licence.

# Systematic review of the effectiveness of Health Equity Audits: existing evidence and call for further research

**Authors:** Kim Robin van Daalen<sup>1</sup>, Fiona Davey<sup>2</sup>, Claire Norman<sup>3</sup>, John Ford<sup>4</sup>

<sup>1</sup> Cardiovascular Epidemiology Unit, Department of Public Health and Primary Care, University of Cambridge, Cambridge, United Kingdom

<sup>2</sup> Mel and Enid Zuckerman College of Public Health, University of Arizona, Tucson, USA

<sup>3</sup> Population Health Sciences Institute, Newcastle University, Newcastle upon Tyne, UK

<sup>4</sup> Department of Public Health and Primary Care, University of Cambridge, Cambridge, United Kingdom

**Corresponding Author:** John Ford, Cambridge Institute of Public Health, University of Cambridge, Forvie Site, Robinson Way, Cambridge CB2 0SR, United Kingdom ([jf653@medschl.cam.ac.uk](mailto:jf653@medschl.cam.ac.uk))

**Manuscript word count:** 3219

**Number of figures:** 1

**Number of tables:** 3

**Supplement materials:** 1 table

**Funding statement:** This research received no specific grant from any funding agency in the public, commercial or not-for-profit sectors. Kim van Daalen is funded by the Gates Cambridge Scholarship (OPP1144). Claire Norman holds an extended Academic Integrated Training Post funded by a Health Education England North East.

**Competing interest statement:** The authors have no competing interests to declare.

**Patient consent:** None required.

**Provenance and peer review:** Not commissioned; externally peer reviewed.

**Data sharing statement:** There are no additional data available.

**Author's contributions:** JF conceptualized the study supported by KVD, FD and CN. All authors discussed the results and contributed to the final manuscript. JF is the guarantor.

**Patient and Public Involvement:** Patients or the public were not involved in the design, or conduct, or reporting, or dissemination plans of our research.

**Acknowledgements:** We would like to thank Isla Kuhn for her expertise on the search strategy and extraction from articles from the databases.

**Abstract**

*Objectives:* The purpose of this systematic review is to explore whether health equity audits (HEA) are effective in improving the equity of service provision and reducing health inequalities.

*Design:* Three databases (Ovid Medline, Embase, Web of Science) and grey literature (Opengrey, Google Scholar) were systematically searched for articles published after 2000, reporting on the effectiveness of health equity audits. Title and abstracts were screened according to an eligibility criteria to identify studies which included a full audit cycle (e.g. initial equity analysis, service changes and review). Data were extracted from studies meeting the eligibility criteria after full text review and risk of bias assessed using the ROBINS-I tool. The study was registered prior to its conduction in PROSPERO (CRD 42020218642).

*Results:* The search strategy identified 596 articles. Three HEAs were included from one peer-reviewed journal article, two published reports and one unpublished report. This included 102,851 participants and over 148 practices/pharmacies (information was not recorded for all records). One study reviewed health equity impacts of HEA implementation in key indicators for coronary heart disease, type 2 diabetes, and chronic obstructive pulmonary disease. Two HEAs explored Stop Smoking Services on program access and equity. All reported some degree of reduction in health inequalities compared to prior HEA implementation. However, impact of HEA implementation compared to other concurrent programmes and initiatives was unclear. All included studies were judged to have moderate to serious risk of bias.

**Conclusions**

There is an urgent need to identify effective interventions to address health inequalities. While HEAs are recommended, we only identified limited weak

1  
2  
3 1 evidence to support their use. More evidence is needed to explore whether HEA  
4  
5 2 implementation can reduce inequalities and which factors are influencing  
6  
7 3 effectiveness.  
8  
9  
10 4

#### 5 **Strengths and limitations of this study**

- 6 • This systematic review represents, to our knowledge, the most  
7 comprehensive examination of the evidence on the effectiveness of  
8 health equity audits (HEA) used to reduce inequalities in service provision  
9 and clinical outcomes
- 10 • A broad, prospectively published rigorous search strategy (registered in  
11 PROSPERO) - that included non-English articles and grey literature – was  
12 used.
- 13 • All included studies were judged to be of moderate or serious risk of bias.
- 14 • The study design of the included studies meant that we were unable to  
15 assess the impact of concurrent programmes of work.

#### 17 **Keywords**

18 Health Equity Audits, Equity, Public Health, Intervention

## 1 Introduction

2 The COVID-19 pandemic has exposed and exacerbated structural, longstanding  
3 and unjust drivers of health inequalities, including economic disparities,  
4 geographical deprivation, occupational risks and systematic racism.<sup>1</sup> In the United  
5 Kingdom, the most deprived areas of the country saw a 118% increased death rate  
6 from COVID-19 compared with the least deprived.<sup>2</sup> Likewise, there have been  
7 striking inequalities across minority ethnic groups with people from Pakistan and  
8 Bangladesh living in the UK having higher death rates in both the first and second  
9 waves.<sup>3</sup> However, the inequalities directly related to COVID-19 are likely to be  
10 overshadowed by the inequalities across, for example, socio-economic, ethnic and  
11 gender strata that will indirectly arise from the pandemic's impact on education,  
12 income, welfare, investment, social care and health care.<sup>1</sup> COVID-19 has also  
13 compounded existing healthcare inequalities. During 2019-20, the most deprived  
14 decile had 7% fewer elective admissions than the least, but 51% more emergency  
15 admissions.<sup>4</sup> Whilst there is now a significant body of data and research describing  
16 the problem of health inequalities, there has limited research and data showing  
17 what interventions could reduce them.

18  
19 In response to the emerging inequalities related to COVID-19, Public Health  
20 England recommended the use of Health Equity Audits (HEA).<sup>5</sup> HEA is a tool to  
21 measure and address inequalities in the provision of and access to services, related  
22 health outcomes and determinants of health between different population groups  
23 in order to address inequalities by providing evidence to show whether local health  
24 needs are being met, changing service delivery practices and ensuring resources  
25 are distributed equitably. Compared to other countries the UK has been the  
26 predominant implementer of HEAs, although they have also been used in other

1  
2  
3 1 countries (e.g. Canada<sup>6</sup>, Iran<sup>7</sup> and Italy<sup>8</sup>). Examples include an equity audit of the  
4  
5 2 Health Check programme which found lower uptake in men - especially younger  
6  
7 3 men in deprived areas, and those on the learning disability or severe mental illness  
8  
9 4 register.<sup>9</sup> Furthermore, an equity audit on a diabetic retinopathy screening  
10  
11 5 programme, found that screening was lower in more deprived areas.<sup>10</sup>  
12  
13  
14 6

15  
16 7 HEAs are not a new initiative. In 2002, as part of the UK national health inequalities  
17  
18 8 strategy, HEAs were recommended for all local health systems to address health  
19  
20 9 inequalities. At that time the use of them became widespread, until 2010 when a  
21  
22 10 change in the UK Government led to the cessation of many health inequalities  
23  
24 11 initiatives, in response to the 2008 recession and financial constraint. Their use was  
25  
26 12 further reduced after significant health care reforms in England in 2013.<sup>11,12</sup> More  
27  
28 13 recently, a number of equity audits have been undertaken in local health systems  
29  
30 14 and their utilisation is likely to continue expanding in response to the COVID-19  
31  
32 15 pandemic.  
33  
34  
35  
36  
37 16

38  
39 17 Despite the extensive use of HEAs in the past and current recommendations, there  
40  
41 18 is little research on their effectiveness or on the aspects that could make HEAs  
42  
43 19 successful. Therefore, the aim of this study was to assess the effectiveness of HEAs  
44  
45 20 in reducing inequalities and explore factors influencing effectiveness. Importantly  
46  
47 21 we focus on studies with a full audit cycle; those that assess existing inequalities,  
48  
49 22 implement changes/interventions and re-assess inequalities, rather than those  
50  
51 23 studies which only describe the inequalities and make recommendations.  
52  
53  
54 24  
55  
56 25  
57  
58 26  
59  
60



## 1                    2                    3                    4                    5                    6                    7                    8                    9                    10                    11                    12                    13                    14                    15                    16                    17                    18                    19                    20                    21                    22                    23                    24                    25                    26                    27                    28                    29                    30                    31                    32                    33                    34                    35                    36                    37                    38                    39                    40                    41                    42                    43                    44                    45                    46                    47                    48                    49                    50                    51                    52                    53                    54                    55                    56                    57                    58                    59                    60

1                    2                    3                    4                    5                    6                    7                    8                    9                    10                    11                    12                    13                    14                    15                    16                    17                    18                    19                    20                    21                    22                    23                    24                    25                    26                    27                    28                    29                    30                    31                    32                    33                    34                    35                    36                    37                    38                    39                    40                    41                    42                    43                    44                    45                    46                    47                    48                    49                    50                    51                    52                    53                    54                    55                    56                    57                    58                    59                    60

**Methods**

We conducted a systematic review in accordance with established methodology<sup>13</sup> and reported in line with the Preferred Reporting for Systematic Reviews and Meta-analyses (PRISMA) statement.<sup>14</sup> This review was prospectively registered and published with PROSPERO (CRD 42020218642).

### *Search strategy and selection criteria*

Three electronic databases (Ovid Medline, Embase, Web of Science) and grey literature (Opengrey, Google Scholar) were systematically searched from 2000 to February 2021 drawing upon existing inequality related search terms. Search terms included those related to audits and inequity (e.g. equity, access), see **supplementary table 1**. We applied forward and backward screening of all full text publications included and relevant publications (e.g. reviews and reports). After removing duplicate records, abstracts and titles were double-screened according to the selection criteria by two researchers (KvD, FD) using the software Rayyan. Discrepancies were resolved by a third researcher (JF). Inclusion criteria were i) reporting on audits of health equity, ii) focused on health settings, iii) assessing the effectiveness of the audit on reducing health inequity, iv) any study design and v) articles in English, Dutch, German, French and Spanish. Studies were excluded if they were i) published before 2000, ii) solely described the audit protocol and iii) did not assess the effectiveness of the audit, but only the results of the initial equity assessment. All full texts for studies that satisfied the selection criteria were retrieved and double-screened. Any divergences between authors on study eligibility were discussed until consensus was reached.

1  
2  
3 1 Data from included studies were independently extracted by two researchers (KvD,  
4  
5 2 FD). A third researcher resolved any conflicts (CN). The following information was  
6  
7 3 extracted from each study: first author, year of publication, country, aim, study  
8  
9 4 design, data source, population characteristics (e.g. size), inequality measures (e.g.  
10  
11 5 gender, socioeconomic), health service changes, time of data collection, summary  
12  
13 6 of audit performed, and main findings. Terms/categories conflating race and  
14  
15 7 ethnicity are used throughout the paper as a consequence of being commonly used  
16  
17 8 in governmental designation and data collection, but we acknowledge that race  
18  
19 9 and ethnicity are different social concepts. Study authors were contacted for more  
20  
21 10 information where relevant.  
22  
23  
24  
25  
26  
27

### 28 12 *Quality Assessment*

29  
30 13 Two authors (KvD, FD) independently assessed the quality of individual studies  
31  
32 14 using the ROBINS-I tool, which assess the risk of bias across seven domains  
33  
34 15 (<https://www.riskofbias.info/>).<sup>16</sup> Discrepancies between authors were adjudicated  
35  
36 16 by two authors (JF, CN). Due to the small number of studies it was deemed  
37  
38 17 inappropriate to perform a GRADE assessment.  
39  
40  
41  
42

### 43 19 *Synthesis*

44  
45 20 The conduction of meta-analyses or the assessment of publication bias was  
46  
47 21 deemed inappropriate due to the limited number of studies and data  
48  
49 22 heterogeneity. Therefore, the studies were synthesised narratively.  
50  
51  
52  
53  
54  
55  
56  
57  
58  
59  
60

## Results

After removal of duplicates our search identified 596 records. Fifteen records were reviewed in full text and three records were included in the final review. An additional HEA report was identified through contact with an author. A flow diagram of the screening and selection process can be found in **figure 1**. We included two HEAs<sup>15,17,18</sup> reviewing Stop Smoking Services on program access and equity arising from two published and one unpublished report, and one peer-reviewed intervention study<sup>19</sup> reviewing health equity impacts of HEA implementation in key indicators for coronary heart disease (CHD), type 2 diabetes (DMT2), and chronic obstructive pulmonary disease (COPD) (**Table 1**). All included records were conducted in the United Kingdom and utilised a sequential audit design. Across all included HEA there were participants from 148 general practices in London (Newham, City and Hackney, Tower Hamlets) and from general practices and pharmacies participating in the two county Stop Smoking Service programs in Durham and Lewisham, including a total of 102,851 individuals. Data was collected between 2007 and 2017. The included HEAs assessed various inequalities (including inequalities in ethnicity, gender, age, socio-economic group, and location) in service delivery, service access and health outcomes.<sup>15,17,19,18</sup>

The majority of published literature on HEAs were one cycle HEA reports that did not assess HEA effectiveness; we identified 56 records which reported only one HEA cycle from grey literature (n=43) and electronic databases (n=13). The majority of these (n=23) were conducted by local governments, local health care systems (n=21), or combinations of the former (n=4). A minority were carried out by hospitals (n=3), dental services (n=3) or by national health care organisations (n=2). A wide range of services were audited, but the most common were smoking

1  
2  
3 1 cessation services (n=7), cancer screening (n=7) and health promotion  
4  
5 2 programmes (NHS Health Checks) (n=6).  
6  
7  
8 3  
9

#### 4 *Health Equity Audit implementation*

5 Badrick *et al.* implemented and evaluated HEAs in 38 practises in Tower Hamlets  
6 Primary Care Trusts (PCT) which included facilitation sessions encouraging change,  
7 identifying areas of expressed difficulty and engaging teams in finding solutions. The  
8 intervention tracked four key indicators (blood pressure and haemoglobin A1c levels  
9 in DMT2, % smoking in COPD and cholesterol levels in CHD). Changes in performance  
10 over time were then examined for the intervention PCTs compared to neighbouring  
11 non-intervention PCTs (n=110).<sup>19</sup> Roe *et al.*<sup>15,18</sup> and Pringle *et al.*<sup>17</sup> used a before-  
12 and-after comparison rather than the inclusion of a comparison site. Roe *et al.*<sup>15,18</sup>  
13 assessed the Durham NHS Stop Smoking Service's impact on health inequalities.  
14 They explored the rate of access and rate of quitters providing a comparison with  
15 audits conducted in 2007, 2014 and 2018. Slope and Relative Indices of Inequality  
16 were calculated by the socio-economic dimension to inequalities in health.<sup>15,18</sup>  
17 Similarly, Pringle *et al.* compared differences in access and quitting success rates by  
18 through the Lewisham NHS Stop Smoking Service between 2000-2005 (first HEA)  
19 and 2007/8-2011/12 (second HEA).<sup>17</sup>  
20  
21  
22  
23  
24  
25  
26  
27  
28  
29  
30  
31  
32  
33  
34  
35  
36  
37  
38  
39  
40  
41  
42  
43  
44  
45  
46  
47  
48  
49  
50  
51  
52  
53  
54  
55  
56  
57  
58  
59  
60

1  
2  
3  
4  
5  
6  
7  
8  
9  
10  
11  
12  
13  
14  
15  
16  
17  
18  
19  
20  
21  
22  
23  
24  
25  
26  
27  
28  
29  
30  
31  
32  
33  
34  
35  
36  
37  
38  
39  
40  
41  
42  
43  
44  
45  
46

1 Table 1: Study characteristics

2

| First author, year and country                                 | Aim                                                                                                                                                                                                                                                                                                                                   | Study design      | Data sources                                                                                                                                                                                                                                                                                                                                                               | Population                                                                                                                          | Inequality measures (e.g. SES, gender)                                                                                                                                                          | Resulting recommendations for service delivery changes                                                                                                                                                                                                                                                                                                                                                                                                                                                                | Time between data collection                                                                                                               |
|----------------------------------------------------------------|---------------------------------------------------------------------------------------------------------------------------------------------------------------------------------------------------------------------------------------------------------------------------------------------------------------------------------------|-------------------|----------------------------------------------------------------------------------------------------------------------------------------------------------------------------------------------------------------------------------------------------------------------------------------------------------------------------------------------------------------------------|-------------------------------------------------------------------------------------------------------------------------------------|-------------------------------------------------------------------------------------------------------------------------------------------------------------------------------------------------|-----------------------------------------------------------------------------------------------------------------------------------------------------------------------------------------------------------------------------------------------------------------------------------------------------------------------------------------------------------------------------------------------------------------------------------------------------------------------------------------------------------------------|--------------------------------------------------------------------------------------------------------------------------------------------|
| Badrick, E. <i>et al.</i> (2014), United Kingdom <sup>19</sup> | The main aim of the study was to describe the development and implementation of practise equity audits, and an evaluation of changing inequalities over time for three project conditions in inner east London.                                                                                                                       | Sequential audits | Routine clinical and demographic data were collected from practice computer databases, using Morbidity Information Query and Export Syntax (MIQUEST) software and EMIS Web (Egton Medical Information Systems Ltd, 2010) from 148 of the 151 general practices in the three areas of London.                                                                               | Three areas of London (Newham, City and Hackney and Tower Hamlets) with a combined GP-registered population of 829,710 in mid-2008. | Association between self-reported ethnicity, gender, age-band and four key indicators (cholesterol levels in CHD, blood pressure and haemoglobin A1c levels in diabetes and % smoking in COPD). | 38 practices in the intervention arm (Tower Hamlets) received two health equity audits and facilitated time with a cardiovascular nurse specialist to review their results. The study authors recommended prioritizing monitoring inequalities by age, gender, and ethnic group; balancing rigorous, complete reports with simple, brief reports for reaching increased practice audiences; and implementation of HEA facilitation tailored to practice setting and needs to promote changes in clinical performance. | Cross-sectional data were extracted in April of every year between 2007 and 2010 for all patients on the CHD, diabetes and COPD registers. |
| Pringle, E. (2013), United Kingdom <sup>17</sup>               | This health equity audit looks at the use and success of Lewisham’s Stop Smoking Service from April 2007 to March 2012 by age, gender, ethnicity, socioeconomic group and location. In addition, the views of a small number of service users and advisers were sought on factors that may affect the use and success of the service. | Sequential audits | Smoking prevalence data is available from the Integrated Household Survey (IHS) which combines answers from a number of Office of National Statistics (ONS) surveys containing questions about smoking. Interviews with 15 smokers and 6 advisers. Quits dates set from April 1st 2007 to March 31st 2012 were extracted from Quit Manager. Smoking data is self-reported. | Lewisham residents accessing Stop Smoking services.                                                                                 | Association between age, gender, ethnicity, socioeconomic group, and location and service access rates and successful smoking cessation rates.                                                  | The HEA recommended adjusting marketing messages, targeting specific underrepresented groups, collaborating with African American churches to implement Stop Smoking Services, exploring use of innovative technology especially with young smokers, reallocating level 3 advisers to the underrepresented groups who benefit most from their counseling, and undertaking further research on groups not examined in the HEA                                                                                          | April 2007 to March 2012.                                                                                                                  |

|   |                                                 |                                                                                                                                                                                                                                                                                                                                                                                                                                                                                                           |                   |                                                                                                                                                                                                                                                                                                                                                                   |                                                                                                                                                                 |                                                                                                                                                                              |                                                                          |
|---|-------------------------------------------------|-----------------------------------------------------------------------------------------------------------------------------------------------------------------------------------------------------------------------------------------------------------------------------------------------------------------------------------------------------------------------------------------------------------------------------------------------------------------------------------------------------------|-------------------|-------------------------------------------------------------------------------------------------------------------------------------------------------------------------------------------------------------------------------------------------------------------------------------------------------------------------------------------------------------------|-----------------------------------------------------------------------------------------------------------------------------------------------------------------|------------------------------------------------------------------------------------------------------------------------------------------------------------------------------|--------------------------------------------------------------------------|
|   |                                                 |                                                                                                                                                                                                                                                                                                                                                                                                                                                                                                           |                   |                                                                                                                                                                                                                                                                                                                                                                   |                                                                                                                                                                 |                                                                                                                                                                              |                                                                          |
| 7 | Roe, K. (2018),<br>United Kingdom <sup>15</sup> | The purpose of these reports is to assess whether the County Durham NHS Stop Smoking Service is having an impact on health inequalities. It aims to identify how services are delivered relative to the deprivation levels across County Durham and provide analysis by the two Clinical Commissioning Groups within its borders. The reports analyse the rate of access and rate of quitters. This Health Equity Audit (HEA) also provides a comparison with previous audits conducted in 2007 and 2014. | Sequential audits | Source of the data is Durham County Council Public Health Intelligence Team (DCCPHIT). The raw data for the 2014 and 2018 HEAs is taken from Quit manager; a Stop Smoking Service web-based patient data management system. The 2007 data was collated from 5 different reports from localities within Co. Durham and the source of the quit dates is not stated. | 2014 – Durham residents accessing Stop Smoking services, 23,350 used records<br><br>2018 – Durham residents accessing Stop Smoking Services, 9,240 used records | Deprivation was measured at small area level and the Relative Index of Inequality (Rii) and the Slope Index of Inequality (Sii) were used to compare inequalities over time. | 2014 - January 2011 to March 2013<br><br>2018 - April 2015 to March 2017 |

1  
2  
3 1 *Changes in inequalities during audit period*  
4

5 2 All HEAs reported baseline inequitable outcomes in physical health outcomes<sup>19</sup>,  
6  
7 3 health behaviours, and access to or utilisation of health services by age, gender,  
8  
9 4 ethnicity, socio-economic status and location.<sup>15,17,18</sup> During the audit period,  
10  
11 5 some degree of reduced inequality was observed in all records compared to the  
12  
13 6 comparison group<sup>19</sup> or prior HEA data (**Table 2**).<sup>15,17,18</sup> In Tower Hamlets' PCTs,  
14  
15 7 reductions in gender and age group differences were found in DMT2 and CHD.  
16  
17 8 Yet, whilst all ethnic groups showed improvement over the years of HEA  
18  
19 9 implementation, there was no reduction in difference between ethnic groups.  
20  
21 10 Furthermore, some groups showed a widening of inequalities. For example, in  
22  
23 11 the CHD register South Asians increased from being 1.9 (1.6-2.2) times more  
24  
25 12 likely than White groups to have cholesterol levels < 4 mmol/L in 2007 to being  
26  
27 13 to 2.4 (2.0-2.8) more likely in 2010.  
28  
29  
30  
31

32 14  
33  
34 15 Similarly, smoking rates in COPD indicate increased disparity between White and  
35  
36 16 other ethnic groups in 2010.<sup>19</sup> The audit of the Lewisham Stop Smoking Service  
37  
38 17 found an increase in service access by black and ethnic minority groups as well  
39  
40 18 as by people from deprived areas (2007/2008 – 2011/12) as compared to prior  
41  
42 19 audits (2000-2005). However, the HEA report also identified several population  
43  
44 20 groups still underrepresented in access rates (e.g. younger smokers, older  
45  
46 21 women, Indian men, Chinese men, white Irish men and black African smokers)  
47  
48 22 and an overall lack of equity in program access and success rates.<sup>17</sup> The 2014 Stop  
49  
50 23 Smoking Service HEA in County Durham found a reduction in health inequalities  
51  
52 24 compared to prior audits (2007) as demonstrated by a consistent increase in the  
53  
54 25 relative index of inequality, the size of the gap between the least and the most  
55  
56 26 deprived areas expressed as the average rate over all wards, for access and  
57  
58  
59  
60

1 smoking quit rates. Furthermore, a reduction in access rate to quit rate was  
2  
3 1 observed – gap of 69% to 16% in 2007 and 2014 respectively.<sup>15</sup> Reductions in the  
4  
5 2  
6 3  
7 4  
8 5  
9 6  
10 7  
11 8  
12 9  
13 10  
14 11  
15 12  
16 13  
17 14  
18 15  
19 16  
20 17  
21 18  
22  
23  
24  
25  
26  
27  
28  
29  
30  
31  
32  
33  
34  
35  
36  
37  
38  
39  
40  
41  
42  
43  
44  
45  
46  
47  
48  
49  
50  
51  
52  
53  
54  
55  
56  
57  
58  
59  
60

### *Study quality assessment*

8 Study quality assessment was conducted using the ROBINS-I tool. Each included  
9 record was found to have a serious or moderate risk of bias in the various  
10 categories assessed (**Table 3**). Confounding may have influenced the results of  
11 the reports due to the inadequacy of study designs to differentiate effectiveness  
12 of HEA implementation from simultaneously implemented local improvement  
13 initiatives, the “noise” of a changing NHS or other societal changes that may have  
14 led to reduced or increased inequalities. The potential selection of health  
15 practises that already established an equity-focus may have resulted in selection  
16 bias, meaning that results may not be generalisable to most areas in the United  
17 Kingdom. Likewise, as included studies have solely been performed in the UK  
18 results may not be applicable to other countries.



1  
2  
3  
4  
5  
6  
7  
8  
9  
10  
11  
12  
13  
14  
15  
16  
17  
18  
19  
20  
21  
22  
23  
24  
25  
26  
27  
28  
29  
30  
31  
32  
33  
34  
35  
36  
37  
38  
39  
40  
41  
42  
43  
44  
45  
46

1 **Table 2: Study results**  
2

| First author, year                                                                                        | Summary of audit                                                                                                                                                                                                                                                                                                                      | Main findings                                                                                                                                                                                                                                                                                                                                                                                                                                                                                                                                                                                                                                                                                                                                                                                                                                                                                                                                                                                                            |
|-----------------------------------------------------------------------------------------------------------|---------------------------------------------------------------------------------------------------------------------------------------------------------------------------------------------------------------------------------------------------------------------------------------------------------------------------------------|--------------------------------------------------------------------------------------------------------------------------------------------------------------------------------------------------------------------------------------------------------------------------------------------------------------------------------------------------------------------------------------------------------------------------------------------------------------------------------------------------------------------------------------------------------------------------------------------------------------------------------------------------------------------------------------------------------------------------------------------------------------------------------------------------------------------------------------------------------------------------------------------------------------------------------------------------------------------------------------------------------------------------|
| Badrick, E. <i>et al.</i> (2014), United Kingdom <sup>19</sup>                                            | The audit aimed to reduce health inequalities by ethnicity, age and gender in the management of three common chronic diseases (coronary heart disease, type 2 diabetes mellitus and chronic obstructive pulmonary disease).                                                                                                           | <p>Baseline inequalities in each condition across the three east London areas were identified. At a crude level, performance in cholesterol, BP and HbA1c improved in all areas over time. All ethnic groups showed improvement, but there was no evidence of a reduction in differences between ethnic groups.</p> <p>Over the three-year study, a reduction in health inequalities was measured in some groups (such as patients over 85 years with diabetes) with only slight reductions in, continued, or worsened inequalities observed in most other groups. Compared to the neighbouring areas, Tower Hamlets (receiving the intervention) had smaller improvement levels in CHD, higher absolute changes in both diabetes measures, and small but similar changes in rates of smoking in COPD patients. The study reported positive GP responses to the intervention providing assistance in conducting/interpreting HEAs.</p> <p>Reductions in gender and age group differences were noted in DMT2 and CHD.</p> |
| Pringle, E. (2013), United Kingdom <sup>17</sup>                                                          | This health equity audit looks at the use and success of Lewisham’s Stop Smoking Service from April 2007 to March 2012 by age, gender, ethnicity, socioeconomic group and location. In addition, the views of a small number of service users and advisers were sought on factors that may affect the use and success of the service. | Since the last equity audit more smokers from black and ethnic minority groups were using the service. In addition, this health equity audit shows that over the last five years the Stop Smoking Service was reaching an increasing number of people from deprived areas. More quit dates were set by smokers from deprived areas than from less deprived areas. Overall, this health equity audit shows that there was not equity across Lewisham’s smokers in the use and success of Lewisham’s Stop Smoking Service in terms of the need for stop smoking services. The population groups that seemed to be underrepresented in their use of the service were: younger smokers, older women, Indian men, Chinese men, white Irish men and black African smokers. Additionally, smokers from more deprived areas, routine and manual workers, students and unemployed smokers were less likely to successfully quit smoking.                                                                                          |
| Roe, K. <i>et al</i> (2014), United Kingdom <sup>15</sup><br>Roe, K. (2018), United Kingdom <sup>18</sup> | This HEA assesses the distribution of the Durham Stop Smoking Service (SSS) and its effectiveness relative to deprivation levels within County Durham and the two Clinical Commissioning Groups (CCGs) within its borders.                                                                                                            | <p>2014 - Compared to the results of the 2007 HEA there has been an increase in the relative index of inequality for access and quit rates as well as a reduction in the difference between the two, indicating that the County Durham SSS is contributing to a reduction in health inequalities.</p> <p>2018 - The County Durham SSS has been successful in contributing to a reduction in the equity gap, seeing a consistent increase in the relative index of inequality for access and quit rates. This was true for services accessed in pharmacies, primary care, and specialist Stop Smoking Service. The audit found a higher rate of pregnant smokers in more deprived areas, but also a higher quit rate for pregnant smokers who accessed the services in more deprived areas. This indicates that the County Durham Stop Smoking Service is contributing to a reduction in health inequalities.</p>                                                                                                         |

**Table 3: Risk of bias – ROBINS-I tool**

| <i>Study</i>                                                   | Bias due to confounding | Bias due to selection of organisations into study | Bias in classification of interventions | Bias due to deviations from intended interventions | Bias due to missing data | Bias in measurement of outcomes | Bias in selection of reported result |
|----------------------------------------------------------------|-------------------------|---------------------------------------------------|-----------------------------------------|----------------------------------------------------|--------------------------|---------------------------------|--------------------------------------|
| Badrick, E. <i>et al.</i> (2014), United Kingdom <sup>19</sup> | Serious                 | Serious                                           | Low                                     | No information                                     | Low                      | Moderate                        | Low                                  |
| Pringle, E. (2013), United Kingdom <sup>17</sup>               | Serious                 | Serious                                           | Low                                     | No information                                     | Moderate                 | Moderate                        | Moderate                             |
| Roe, K. <i>et al.</i> (2014), United Kingdom <sup>15</sup>     | Serious                 | Serious                                           | Low                                     | No information                                     | Moderate                 | Moderate                        | Low                                  |
| Roe, K. (2018), United Kingdom <sup>18</sup>                   |                         |                                                   |                                         |                                                    |                          |                                 |                                      |

**Discussion**

This systematic review represents, to our knowledge, the most comprehensive examination of the evidence on the effectiveness of health equity audits. We identified three HEAs<sup>15,17, 19, 18</sup> based in health care or public health settings with serious to moderate risk of bias. All showed the presence of baseline inequalities and found reductions in health inequalities across various strata in the subsequent years of initial HEAs. Only one study used comparison sites.<sup>19</sup>

*Meaning of the results*

There has been little research undertaken to explore the effectiveness of HEAs, despite them being widely used in the UK during the 2000s and currently being recommended by PHE.<sup>5,11</sup> This may be because of methodological challenges in assessing effectiveness or an assumption that they are the right strategy. The majority of HEAs we identified only undertook one cycle, suggesting that practitioners tend to use HEAs as a tool to assess the existing inequalities within a service rather than a tool to record or reduce inequalities over time. Although HEAs may be useful at identifying areas of health inequity or greater need, without

1  
2  
3 1 repeating the data collection it is not possible to say whether the HEA resulted in  
4  
5 2 any meaningful service change or targeted intervention, let alone whether this  
6  
7 3 resulted in a reduction in inequities.  
8  
9

10 4  
11  
12 5 We only identified three HEAs that completed the audit cycle to assess if the  
13  
14 6 recommendations and changes resulted in a reduction in inequalities over time.  
15  
16 7 The lack of peer reviewed research assessing HEA effectiveness may reflect the lack  
17  
18 8 of health care and public health services to evaluate the impact and effectiveness  
19  
20 9 of decisions, with a much greater focus on addressing problems. It may also reflect  
21  
22 10 difficulties presented by frequently changing priorities and frequent turnover of  
23  
24 11 staff. Furthermore, a reluctance to publish HEAs may exist as they could cause  
25  
26 12 reputational damage to organisations or even a concern that the findings may  
27  
28 13 leave the organisation open to legal challenge under equality legislation.  
29  
30 14 Qualitative research around clinical audit has shown that audit is seen as “a time-  
31  
32 15 consuming, additional chore and a managerially driven exercise”<sup>20</sup> that is  
33  
34 16 hampered by a lack of resources, lack of expertise, lack of audit plan, and  
35  
36 17 organisational impediments.<sup>21</sup> Organisational change and austerity measures have  
37  
38 18 meant that local authority Public Health teams have faced increased  
39  
40 19 responsibilities and real-terms funding cuts.<sup>22</sup>  
41  
42  
43  
44  
45  
46  
47

48 21 The single peer-reviewed article was undertaken in a number of general practices  
49  
50 22 in London. The authors found that it was possible to undertake equity analysis in  
51  
52 23 general practice using routine data. While all of the included studies identified  
53  
54 24 some reductions in health inequalities during the HEA process, only Badrick *et al.*  
55  
56 25 had a suitable comparison group. Furthermore, in the absence of randomised  
57  
58 26 intervention studies and further high-quality observational studies, attributing  
59  
60

1  
2  
3 1 changes in equities to HEAs based on the included reports is inappropriate due to  
4  
5 2 the potential confounding and biases introduced. No evidence was found to  
6  
7 3 suggest that HEAs result in harm or should not be undertaken in the absence of  
8  
9  
10 4 further evidence.  
11  
12 5

#### 13 14 6 *Comparison with existing literature*

15  
16 7 Aspinall and Jacobson<sup>23</sup> undertook a baseline survey in 2004 of practitioners'  
17  
18 8 experiences across England in the first HEA implementation year of undertaking  
19  
20 9 nationally mandated. The authors found that national target-setting, national  
21  
22  
23 10 guidance on self-assessment and the inclusion of HEAs within a ratings system  
24  
25 11 influenced whether the process and, in a significant minority, implementation of  
26  
27  
28 12 the findings of HEAs became part of healthcare systems' routine business.<sup>23</sup>  
29  
30 13

31  
32 14 There is a sizable body of research looking at the effectiveness of clinical audits  
33  
34 15 (i.e. non-equity focused). For example, a Cochrane review examined the impact  
35  
36  
37 16 of audit and feedback on professional behaviour. The authors identified 140  
38  
39 17 randomised controlled trials and found that audit and feedback has small but  
40  
41 18 important improvements in professionals behaviour.<sup>24</sup> Similarly there is  
42  
43 19 evidence for the use of quality improvement methods with some consideration  
44  
45 20 to equity. Lu *et al.* found that about a third of quality improvement projects in  
46  
47  
48 21 diabetes care included an equity perspective.<sup>25</sup>  
49  
50 22

51  
52 23 However, these findings are not necessarily transferable to HEAs as clinical  
53  
54 24 audits and quality improvement programmes are generally undertaken at a  
55  
56  
57 25 smaller organisation-level and focus on adherence to evidence-based best  
58  
59 26 practice guidance. HEAs are generally implemented at a higher organisational  
60

1  
2  
3 1 level, such as across a local government level or health care system, and it is not  
4  
5 2 always clear what actions are needed to reduce the inequalities gap. To illustrate,  
6  
7 3 Regmi *et al.* undertook a review of factors that support the reduction of  
8  
9 4 inequalities in local health care systems in the UK and found that there was little  
10  
11 5 evidence that local health care arrangements alone were effective in reducing  
12  
13 6 health inequalities.<sup>26</sup>  
14  
15  
16  
17 7

18  
19 8 However, there are a number of principles drawn from clinical audit and quality  
20  
21 9 improvement methods which may be effective in HEAs. Grimshaw *et al.* argue  
22  
23 10 for an implementation laboratory where there is a continual cycle of testing  
24  
25 11 different interventions and implementation strategies through audit and  
26  
27 12 feedback which may be effective in reducing health inequalities through HEA  
28  
29 13 implementation.<sup>27</sup>  
30  
31  
32  
33  
34  
35

### 36 15 *Strengths and limitations*

37 16 Our research used a prospectively published rigorous systematic review strategy  
38  
39 17 that included non-English articles and grey literature. We had a robust process  
40  
41 18 for screening titles/abstracts and full-texts, extracting data and determining the  
42  
43 19 risk of bias using a validated tool for quality assessment. However, only one HEA  
44  
45 20 with multiple years of data was found in the peer reviewed literature and all  
46  
47 21 reports included were of low to moderate quality. It is likely that there are a  
48  
49 22 number of HEAs not in the public domain. Yet, based on our research, most of  
50  
51 23 these are likely to only contain one HEA cycle. There may be a publication bias  
52  
53 24 towards studies reporting positive results (i.e. reductions in inequalities).  
54  
55 25 Importantly, as the reports included are sequential audits rather than well-  
56  
57 26 designed randomised studies, they may not have been equipped to differentiate  
58  
59  
60

1  
2  
3 1 HEA effectiveness from simultaneously implemented local improvement  
4  
5 2 initiatives, the “noise” of a changing NHS or other societal changes that may have  
6  
7 3 led to reduced or increased inequalities.  
8  
9

10 4  
11  
12 5 *Implications for research and policy*  
13

14 6 While the efforts to address inequalities in health care are not new, the impacts of  
15  
16 7 the pandemic have starkly delineated the imperative to do so. There is an urgent  
17  
18 8 need to find effective interventions to reduce health inequalities. Public Health  
19  
20 9 England recommends the use of HEAs and has published accompanying guidance  
21  
22 10 describing step-by-step processes of HEA implementation.<sup>5</sup> Yet, thus far, it is  
23  
24 11 unclear whether this has been supported by scientific evidence. It is likely that  
25  
26 12 there are key factors that will make HEA undertaking effective in inequality  
27  
28 13 reduction and factors that will not. For example, previous research has found that  
29  
30 14 audits tend to be more effective when feedback is given by respected colleagues,  
31  
32 15 there is frequent data presentation, both goals and action-plans are included and  
33  
34 16 the recipients are non-physicians.<sup>28</sup> Therefore, further well-designed studies with  
35  
36 17 suitable comparison groups are essential to further inform on the effectiveness of  
37  
38 18 HEAs. Process evaluation are needed to understand the factors that optimise HEA  
39  
40 19 effectiveness and implementation processes. Decision-makers may be more likely  
41  
42 20 to change behaviour based on case examples of how HEAs have been used to  
43  
44 21 reduce inequalities.  
45  
46 22  
47  
48  
49

50  
51  
52 23 While there is limited evidence for use of HEAs, we do believe that they should still  
53  
54 24 be used until further research is undertaken because we did not find any evidence  
55  
56 25 of harm and there is a logical rationale by which they could reduce inequalities.  
57  
58 26 The priority for policy makers is evaluating ongoing HEA and generating the  
59  
60

1  
2  
3 1 evidence base to understand if they work and, if so, what makes them most  
4  
5 2 effective.  
6  
7  
8 3  
9

#### 10 4 **Conclusion**

11  
12 5 Research and practice demonstrate that meaningfully impacting inequalities in both health  
13  
14 6 outcomes and healthcare delivery is a complicated, challenging task faced by already  
15  
16 7 overburdened and under-resourced health systems. Whilst HEA implementation is  
17  
18 8 currently recommended, evidence for their effectiveness in reducing inequalities is sparse.  
19  
20 9 This evidence gap requires action. Efforts to reduce inequalities must neither be avoided  
21  
22 10 nor delayed because of their complicated nature; nor should they be undertaken  
23  
24 11 haphazardly without much needed, evidence-based guidelines. Further research is needed  
25  
26 12 to assess their effectiveness and understand what makes them effective (or not).  
27  
28  
29

#### 30 13 **References**

- 31 14
- 32 15 1. Bambra C, Riordan R, Ford J, Matthews F. The COVID-19 pandemic and health inequalities. *J*  
33  
34 16 *Epidemiol Community Health*. 2020;74(11):964-968. doi:10.1136/jech-2020-214401  
35  
36 17 2. Deaths involving COVID-19 by local area and socioeconomic deprivation - Office for National  
37  
38 18 Statistics. Accessed April 21, 2021.  
39  
40 19 <https://www.ons.gov.uk/peoplepopulationandcommunity/birthsdeathsandmarriages/deaths>  
41  
42 20 [/bulletins/deathsinvolvingcovid19bylocalareasanddeprivation/deathsoccurringbetween1mar](https://www.ons.gov.uk/peoplepopulationandcommunity/birthsdeathsandmarriages/deaths/bulletins/deathsinvolvingcovid19bylocalareasanddeprivation/deathsoccurringbetween1marchand31may2020)  
43  
44 21 [chand31may2020](https://www.ons.gov.uk/peoplepopulationandcommunity/birthsdeathsandmarriages/deaths/bulletins/deathsinvolvingcovid19bylocalareasanddeprivation/deathsoccurringbetween1marchand31may2020)  
45  
46 22 3. Nafilyan V, Islam N, Mathur R, et al. *Ethnic Differences in COVID-19 Mortality during the First*  
47  
48 23 *Two Waves of the Coronavirus Pandemic: A Nationwide Cohort Study of 29 Million Adults in*  
49  
50 24 *England*. Cold Spring Harbor Laboratory Press; 2021. doi:10.1101/2021.02.03.21251004  
51  
52 25 4. Hospital Admitted Patient Care Activity 2019-20 - NHS Digital. Accessed April 21, 2021.  
53  
54 26 <https://digital.nhs.uk/data-and-information/publications/statistical/hospital-admitted->  
55  
56  
57  
58  
59  
60

- 1  
2  
3 1 patient-care-activity/2019-20  
4  
5 2 5. United Kingdom Government. Health Equity Assessment Tool (HEAT): executive summary.  
6  
7 3 Accessed February 28, 2021. [https://www.gov.uk/government/publications/health-equity-](https://www.gov.uk/government/publications/health-equity-assessment-tool-heat/health-equity-assessment-tool-heat-executive-summary)  
8  
9 4 [assessment-tool-heat/health-equity-assessment-tool-heat-executive-summary](https://www.gov.uk/government/publications/health-equity-assessment-tool-heat/health-equity-assessment-tool-heat-executive-summary)  
10  
11 5 6. *The Health Care Equity Audit Guide.*; 2014. Accessed May 7, 2021. [www.communityview.ca](http://www.communityview.ca)  
12  
13 6 7. Karimi S, Moghadam SAHZ. Designing a health equity audit model for Iran in 2010. *J Res Med*  
14  
15 7 *Sci.* 2011;16(4):541-552. Accessed February 28, 2021.  
16  
17 8 <http://www.ncbi.nlm.nih.gov/pubmed/22091272>  
18  
19 9 8. Salomone M, Canavese C, Bérghamo D, et al. Guidelines audit may overcome disparities in  
20  
21 10 health care: experience of an Italian region. *J Nephrol.* Published online 2006.  
22  
23 11 9. Derbyshire County Council. *Health Equity Audit NHS Health Check Programme in Derbyshire*  
24  
25 12 *County.*; 2015. <https://www.healthcheck.nhs.uk/seecmsfile/?id=350>  
26  
27 13 10. Fraser S, Watkinson, Rennie, et al. Sociodemographic differences in diabetic retinopathy  
28  
29 14 screening; using patient-level primary care data for health equity audit. *Clin Audit.* 2011;3:7.  
30  
31 15 [doi:10.2147/CA.S25313](https://doi.org/10.2147/CA.S25313)  
32  
33 16 11. Barr B, Higgerson J, Whitehead M. Investigating the impact of the English health inequalities  
34  
35 17 strategy: Time trend analysis. *BMJ.* 2017;358. [doi:10.1136/bmj.j3310](https://doi.org/10.1136/bmj.j3310)  
36  
37 18 12. Timmins N. *Never Again? The Story of the Health and Social Care Act 2012.*; 2012. Accessed  
38  
39 19 May 7, 2021.  
40  
41 20 <https://www.instituteforgovernment.org.uk/sites/default/files/publications/Never>  
42  
43 21 [again\\_0.pdf](https://www.instituteforgovernment.org.uk/sites/default/files/publications/Never)  
44  
45 22 13. Cochrane Handbook for Systematic Reviews of Interventions | Cochrane Training. Accessed  
46  
47 23 May 7, 2021. <https://training.cochrane.org/handbook>  
48  
49 24 14. Moher D, Liberati A, Tetzlaff J, Altman DG. Preferred reporting items for systematic reviews  
50  
51 25 and meta-analyses: The PRISMA statement. *BMJ.* 2009;339(7716):332-336.  
52  
53 26 [doi:10.1136/bmj.b2535](https://doi.org/10.1136/bmj.b2535)  
54  
55  
56  
57  
58  
59  
60



- 1  
2  
3 1 15. Roe K, Woodall D FMA. *Health Equity Audit of County Durham NHS Stop Smoking Services.*;  
4  
5 2  
6 2014.  
7  
8 3 16. Sterne JA, Hernán MA, Reeves BC, et al. ROBINS-I: A tool for assessing risk of bias in non-  
9  
10 4  
11 randomised studies of interventions. *BMJ*. 2016;355. doi:10.1136/bmj.i4919  
12 5 17. Pringle E. *Health Equity Audit of Lewisham's Stop Smoking Service 2007-2012.*; 2013.  
13  
14 6 18. Roe K. *A Health Equity Audit of County Durham NHS Stop Smoking Services 2018.*; 2018.  
15  
16 7 19. Badrick E, Hull S, Mathur R, et al. Health equity audits in general practice: a strategy to reduce  
17  
18 8  
19 health inequalities. *Prim Health Care Res Dev*. 2014;15(1):80-95.  
20  
21 9  
22 doi:10.1017/S1463423612000606  
23 10 20. Bowie P, Bradley NA, Rushmer R. Clinical audit and quality improvement - Time for a rethink?  
24  
25 11  
26 *J Eval Clin Pract*. 2012;18(1):42-48. doi:10.1111/j.1365-2753.2010.01523.x  
27  
28 12 21. Johnston G, Crombie IK, Davies HTO, Alder EM, Millard A. Reviewing audit: Barriers and  
29  
30 13  
31 facilitating factors for effective clinical audit. *Qual Heal Care*. 2000;9(1):23-36.  
32  
33 14  
34 doi:10.1136/qhc.9.1.23  
35 15 22. David Buck. *The English Local Government Public Health Reforms: An Independent*  
36  
37 16  
38 *Assessment.*; 2020. Accessed February 28, 2021. [www.kingsfund.org.uk](http://www.kingsfund.org.uk)  
39 17 23. Aspinall PJ, Jacobson B. Managing health inequalities locally: A baseline survey of primary  
40  
41 18  
42 care trusts' experience with health equity audit in the implementation year. *Heal Serv Manag*  
43  
44 19  
45 *Res*. 2005;18(4):223-231. doi:10.1258/095148405774518606  
46 20 24. Ivers N, Jamtvedt G, Flottorp S, et al. Audit and feedback: Effects on professional practice and  
47  
48 21  
49 healthcare outcomes. *Cochrane Database Syst Rev*. 2012;2012(6).  
50  
51 22  
52 doi:10.1002/14651858.CD000259.pub3  
53 23 25. Lu JB, Danko KJ, Elfassy MD, Welch V, Grimshaw JM, Ivers NM. Do quality improvement  
54  
55 24  
56 initiatives for diabetes care address social inequities? Secondary analysis of a systematic  
57  
58 25  
59 review. *BMJ Open*. 2018;8(2):18826. doi:10.1136/bmjopen-2017-018826  
60  
26 26. Regmi K, Mudyarabikwa O. A systematic review of the factors - barriers and enablers -

- 1  
2  
3 1 affecting the implementation of clinical commissioning policy to reduce health inequalities in  
4  
5 2 the National Health Service (NHS), UK. *Public Health*. 2020;186:271-282.  
6  
7 3 doi:10.1016/j.puhe.2020.07.027  
8  
9  
10 4 27. Grimshaw JM, Ivers N, Linklater S, et al. Reinvigorating stagnant science: Implementation  
11  
12 5 laboratories and a meta-laboratory to efficiently advance the science of audit and feedback.  
13  
14 6 *BMJ Qual Saf*. 2019;28(5):416-423. doi:10.1136/bmjqs-2018-008355  
15  
16 7 28. Ivers NM, Grimshaw JM, Jamtvedt G, et al. Growing Literature, Stagnant Science? Systematic  
17  
18 8 Review, Meta-Regression and Cumulative Analysis of Audit and Feedback Interventions in  
19  
20 9 Health Care. *J Gen Intern Med*. 2014;29(11):1534-1541. doi:10.1007/s11606-014-2913-y  
21  
22  
23  
24  
25  
26  
27  
28  
29  
30  
31  
32  
33  
34  
35  
36  
37  
38  
39  
40  
41  
42  
43  
44  
45  
46  
47  
48  
49  
50  
51  
52  
53  
54  
55  
56  
57  
58  
59  
60

1  
2  
3  
4  
5  
6  
7  
8  
9  
10  
11  
12  
13  
14  
15  
16  
17  
18  
19  
20  
21  
22  
23  
24  
25  
26  
27  
28  
29  
30  
31  
32  
33  
34  
35  
36  
37  
38  
39  
40  
41  
42  
43  
44  
45  
46  
47  
48  
49  
50  
51  
52  
53  
54  
55  
56  
57  
58  
59  
60

**Figure 1:** Study selection process

For peer review only

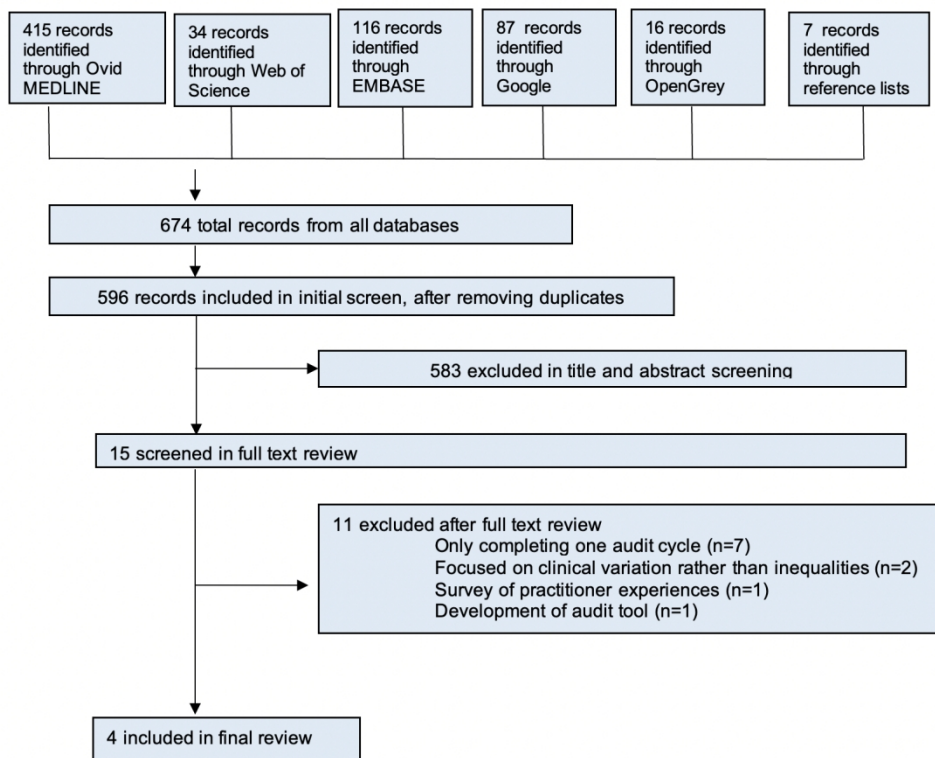

Figure 1: Study selection process

303x237mm (144 x 144 DPI)

**Supplement Material to Systematic Review on the Effectiveness of Health Equity Audits: existing evidence and call for further research.**

**Supplementary Table 1: Search Strategy**

| Database                                                                                                 | Search Strategy                                                                                                                                                                                                                                                                                                                                 |
|----------------------------------------------------------------------------------------------------------|-------------------------------------------------------------------------------------------------------------------------------------------------------------------------------------------------------------------------------------------------------------------------------------------------------------------------------------------------|
| Ovid MEDLINE(R) and Epub Ahead of Print, In-Process & Other Non-Indexed Citations, Daily and Versions(R) | (Audit*).ti. or exp *management audit/ or exp *clinical audit/<br>AND<br>(Health* adj3 (equit* or inequit* or equalit* or inequalit* or disparit* or access* or inaccess*)).ti. or (socioeconomic).ti. or exp *health services accessibility/ or exp *socioeconomic factors/ or exp *health status disparities/ or exp *healthcare disparities/ |
| Embase                                                                                                   | (Audit*).ti. or exp *management/ or exp *clinical audit/<br>AND<br>(Health* adj3 (equit* or inequit* or equalit* or inequalit* or disparit* or access* or inaccess*)).ti. or (socioeconomic).ti. or exp *health services access/ or exp *socioeconomics/ or exp *health disparity/                                                              |
| Web of Science                                                                                           | TI=(Audit*)<br>AND<br>TI=(Health* near/3 (equit* or inequit* or equalit* or inequalit* or disparit* or access* or inaccess*)) or TI=(socioeconomic)                                                                                                                                                                                             |
| OpenGrey                                                                                                 | Health* equi* audit<br>health* inequali* audit<br>health* disparit* audit<br>health* inaccessibility audit<br>health* accessibility audit                                                                                                                                                                                                       |
| Google                                                                                                   | allintitle: audit "healthcare inequalities" filetype:pdf<br>allintitle: audit "healthcare disparities" filetype:pdf<br>allintitle: audit "healthcare inaccessibility" filetype:pdf<br>allintitle: audit "health equity" filetype:pdf<br>allintitle: audit "health inequalities" filetype:pdf                                                    |

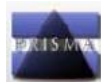

## PRISMA 2020 Checklist

| Section and Topic             | Item # | Checklist item                                                                                                                                                                                                                                                                                       | Location where item is reported |
|-------------------------------|--------|------------------------------------------------------------------------------------------------------------------------------------------------------------------------------------------------------------------------------------------------------------------------------------------------------|---------------------------------|
| <b>TITLE</b>                  |        |                                                                                                                                                                                                                                                                                                      |                                 |
| Title                         | 1      | Identify the report as a systematic review.                                                                                                                                                                                                                                                          | Page 1                          |
| <b>ABSTRACT</b>               |        |                                                                                                                                                                                                                                                                                                      |                                 |
| Abstract                      | 2      | See the PRISMA 2020 for Abstracts checklist.                                                                                                                                                                                                                                                         | Page 2                          |
| <b>INTRODUCTION</b>           |        |                                                                                                                                                                                                                                                                                                      |                                 |
| Rationale                     | 3      | Describe the rationale for the review in the context of existing knowledge.                                                                                                                                                                                                                          | Page 4-5                        |
| Objectives                    | 4      | Provide an explicit statement of the objective(s) or question(s) the review addresses.                                                                                                                                                                                                               | Page 5                          |
| <b>METHODS</b>                |        |                                                                                                                                                                                                                                                                                                      |                                 |
| Eligibility criteria          | 5      | Specify the inclusion and exclusion criteria for the review and how studies were grouped for the syntheses.                                                                                                                                                                                          | Page 6                          |
| Information sources           | 6      | Specify all databases, registers, websites, organisations, reference lists and other sources searched or consulted to identify studies. Specify the date when each source was last searched or consulted.                                                                                            | Page 6                          |
| Search strategy               | 7      | Present the full search strategies for all databases, registers and websites, including any filters and limits used.                                                                                                                                                                                 | Supplement materials table 1    |
| Selection process             | 8      | Specify the methods used to decide whether a study met the inclusion criteria of the review, including how many reviewers screened each record and each report retrieved, whether they worked independently, and if applicable, details of automation tools used in the process.                     | Page 6-7                        |
| Data collection process       | 9      | Specify the methods used to collect data from reports, including how many reviewers collected data from each report, whether they worked independently, any processes for obtaining or confirming data from study investigators, and if applicable, details of automation tools used in the process. | Page 6-7                        |
| Data items                    | 10a    | List and define all outcomes for which data were sought. Specify whether all results that were compatible with each outcome domain in each study were sought (e.g. for all measures, time points, analyses), and if not, the methods used to decide which results to collect.                        | Page 6-7                        |
|                               | 10b    | List and define all other variables for which data were sought (e.g. participant and intervention characteristics, funding sources). Describe any assumptions made about any missing or unclear information.                                                                                         | Page 6-7                        |
| Study risk of bias assessment | 11     | Specify the methods used to assess risk of bias in the included studies, including details of the tool(s) used, how many reviewers assessed each study and whether they worked independently, and if applicable, details of automation tools used in the process.                                    | Page 7                          |
| Effect measures               | 12     | Specify for each outcome the effect measure(s) (e.g. risk ratio, mean difference) used in the synthesis or presentation of results.                                                                                                                                                                  | Page 10-12                      |
| Synthesis methods             | 13a    | Describe the processes used to decide which studies were eligible for each synthesis (e.g. tabulating the study intervention characteristics and comparing against the planned groups for each synthesis (item #5)).                                                                                 | Page 6-7                        |
|                               | 13b    | Describe any methods required to prepare the data for presentation or synthesis, such as handling of missing summary statistics, or data conversions.                                                                                                                                                | Page 6-7                        |
|                               | 13c    | Describe any methods used to tabulate or visually display results of individual studies and syntheses.                                                                                                                                                                                               | Page 6-7                        |
|                               | 13d    | Describe any methods used to synthesize results and provide a rationale for the choice(s). If meta-analysis was performed, describe the model(s), method(s) to identify the presence and extent of statistical heterogeneity, and software package(s) used.                                          | Page 6-7                        |
|                               | 13e    | Describe any methods used to explore possible causes of heterogeneity among study results (e.g. subgroup analysis, meta-regression).                                                                                                                                                                 | NA / Page 7                     |
|                               | 13f    | Describe any sensitivity analyses conducted to assess robustness of the synthesized results.                                                                                                                                                                                                         | NA / Page 7                     |
| Reporting bias assessment     | 14     | Describe any methods used to assess risk of bias due to missing results in a synthesis (arising from reporting biases).                                                                                                                                                                              | Page 7                          |

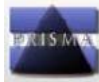

## PRISMA 2020 Checklist

| Section and Topic             | Item # | Checklist item                                                                                                                                                                                                                                                                       | Location where item is reported |
|-------------------------------|--------|--------------------------------------------------------------------------------------------------------------------------------------------------------------------------------------------------------------------------------------------------------------------------------------|---------------------------------|
| Certainty assessment          | 15     | Describe any methods used to assess certainty (or confidence) in the body of evidence for an outcome.                                                                                                                                                                                | Page 7                          |
| <b>RESULTS</b>                |        |                                                                                                                                                                                                                                                                                      |                                 |
| Study selection               | 16a    | Describe the results of the search and selection process, from the number of records identified in the search to the number of studies included in the review, ideally using a flow diagram.                                                                                         | Page 8 / Figure 1               |
|                               | 16b    | Cite studies that might appear to meet the inclusion criteria, but which were excluded, and explain why they were excluded.                                                                                                                                                          | Page 8                          |
| Study characteristics         | 17     | Cite each included study and present its characteristics.                                                                                                                                                                                                                            | Page 9-13                       |
| Risk of bias in studies       | 18     | Present assessments of risk of bias for each included study.                                                                                                                                                                                                                         | Page 13                         |
| Results of individual studies | 19     | For all outcomes, present, for each study: (a) summary statistics for each group (where appropriate) and (b) an effect estimate and its precision (e.g. confidence/credible interval), ideally using structured tables or plots.                                                     | Page 10-11                      |
| Results of syntheses          | 20a    | For each synthesis, briefly summarise the characteristics and risk of bias among contributing studies.                                                                                                                                                                               | Page 15                         |
|                               | 20b    | Present results of all statistical syntheses conducted. If meta-analysis was done, present for each the summary estimate and its precision (e.g. confidence/credible interval) and measures of statistical heterogeneity. If comparing groups, describe the direction of the effect. | NA (Page 7)                     |
|                               | 20c    | Present results of all investigations of possible causes of heterogeneity among study results.                                                                                                                                                                                       | NA (Page 7)                     |
|                               | 20d    | Present results of all sensitivity analyses conducted to assess the robustness of the synthesized results.                                                                                                                                                                           | NA (Page 7)                     |
| Reporting biases              | 21     | Present assessments of risk of bias due to missing results (arising from reporting biases) for each synthesis assessed.                                                                                                                                                              | NA (Page 7)                     |
| Certainty of evidence         | 22     | Present assessments of certainty (or confidence) in the body of evidence for each outcome assessed.                                                                                                                                                                                  | NA (Page 7)                     |
| <b>DISCUSSION</b>             |        |                                                                                                                                                                                                                                                                                      |                                 |
| Discussion                    | 23a    | Provide a general interpretation of the results in the context of other evidence.                                                                                                                                                                                                    | Page 15                         |
|                               | 23b    | Discuss any limitations of the evidence included in the review.                                                                                                                                                                                                                      | Page 18-19                      |
|                               | 23c    | Discuss any limitations of the review processes used.                                                                                                                                                                                                                                | Page 18-19                      |
|                               | 23d    | Discuss implications of the results for practice, policy, and future research.                                                                                                                                                                                                       | Page 19-20                      |
| <b>OTHER INFORMATION</b>      |        |                                                                                                                                                                                                                                                                                      |                                 |
| Registration and protocol     | 24a    | Provide registration information for the review, including register name and registration number, or state that the review was not registered.                                                                                                                                       | Page 6                          |
|                               | 24b    | Indicate where the review protocol can be accessed, or state that a protocol was not prepared.                                                                                                                                                                                       | Page 6                          |
|                               | 24c    | Describe and explain any amendments to information provided at registration or in the protocol.                                                                                                                                                                                      | NA                              |
| Support                       | 25     | Describe sources of financial or non-financial support for the review, and the role of the funders or sponsors in the review.                                                                                                                                                        | Page 1                          |
| Competing                     | 26     | Declare any competing interests of review authors.                                                                                                                                                                                                                                   | Page 1                          |

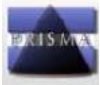

PRISMA 2020 Checklist

| Section and Topic                              | Item # | Checklist item                                                                                                                                                                                                                             | Location where item is reported |
|------------------------------------------------|--------|--------------------------------------------------------------------------------------------------------------------------------------------------------------------------------------------------------------------------------------------|---------------------------------|
| interests                                      |        |                                                                                                                                                                                                                                            |                                 |
| Availability of data, code and other materials | 27     | Report which of the following are publicly available and where they can be found: template data collection forms; data extracted from included studies; data used for all analyses; analytic code; any other materials used in the review. | Page 1                          |

From: Page MJ, McKenzie JE, Bossuyt PM, Boutron I, Hoffmann TC, Mulrow CD, et al. The PRISMA 2020 statement: an updated guideline for reporting systematic reviews. *BMJ* 2021;372:n71. doi: 10.1136/bmj.n71  
 For more information, visit: <http://www.prisma-statement.org/>

For peer review only

1  
2  
3  
4  
5  
6  
7  
8  
9  
10  
11  
12  
13  
14  
15  
16  
17  
18  
19  
20  
21  
22  
23  
24  
25  
26  
27  
28  
29  
30  
31  
32  
33  
34  
35  
36  
37  
38  
39  
40  
41  
42  
43  
44  
45  
46  
47



# BMJ Open

## Health Equity Audits: a systematic review of the effectiveness

|                                 |                                                                                                                                                                                                                                                                                                                                                        |
|---------------------------------|--------------------------------------------------------------------------------------------------------------------------------------------------------------------------------------------------------------------------------------------------------------------------------------------------------------------------------------------------------|
| Journal:                        | <i>BMJ Open</i>                                                                                                                                                                                                                                                                                                                                        |
| Manuscript ID                   | bmjopen-2021-053392.R1                                                                                                                                                                                                                                                                                                                                 |
| Article Type:                   | Original research                                                                                                                                                                                                                                                                                                                                      |
| Date Submitted by the Author:   | 06-Oct-2021                                                                                                                                                                                                                                                                                                                                            |
| Complete List of Authors:       | van Daalen, Kim; University of Cambridge Department of Public Health and Primary Care, Cardiovascular Epidemiology Unit<br>Davey, Fiona; The University of Arizona Mel and Enid Zuckerman College of Public Health<br>Norman, Claire; Newcastle University, Population Health Sciences Institute<br>Ford, John; University of Cambridge, Public Health |
| <b>Primary Subject Heading</b>: | Public health                                                                                                                                                                                                                                                                                                                                          |
| Secondary Subject Heading:      | Evidence based practice                                                                                                                                                                                                                                                                                                                                |
| Keywords:                       | PUBLIC HEALTH, Clinical audit < HEALTH SERVICES ADMINISTRATION & MANAGEMENT, EPIDEMIOLOGY                                                                                                                                                                                                                                                              |
|                                 |                                                                                                                                                                                                                                                                                                                                                        |

SCHOLARONE™  
Manuscripts



I, the Submitting Author has the right to grant and does grant on behalf of all authors of the Work (as defined in the below author licence), an exclusive licence and/or a non-exclusive licence for contributions from authors who are: i) UK Crown employees; ii) where BMJ has agreed a CC-BY licence shall apply, and/or iii) in accordance with the terms applicable for US Federal Government officers or employees acting as part of their official duties; on a worldwide, perpetual, irrevocable, royalty-free basis to BMJ Publishing Group Ltd ("BMJ") its licensees and where the relevant Journal is co-owned by BMJ to the co-owners of the Journal, to publish the Work in this journal and any other BMJ products and to exploit all rights, as set out in our [licence](#).

The Submitting Author accepts and understands that any supply made under these terms is made by BMJ to the Submitting Author unless you are acting as an employee on behalf of your employer or a postgraduate student of an affiliated institution which is paying any applicable article publishing charge ("APC") for Open Access articles. Where the Submitting Author wishes to make the Work available on an Open Access basis (and intends to pay the relevant APC), the terms of reuse of such Open Access shall be governed by a Creative Commons licence – details of these licences and which [Creative Commons](#) licence will apply to this Work are set out in our licence referred to above.

Other than as permitted in any relevant BMJ Author's Self Archiving Policies, I confirm this Work has not been accepted for publication elsewhere, is not being considered for publication elsewhere and does not duplicate material already published. I confirm all authors consent to publication of this Work and authorise the granting of this licence.

# Health Equity Audits: a systematic review of the effectiveness

**Authors:** Kim Robin van Daalen<sup>1</sup>, Fiona Davey<sup>2</sup>, Claire Norman<sup>3</sup>, John Ford<sup>4</sup>

<sup>1</sup> Cardiovascular Epidemiology Unit, Department of Public Health and Primary Care, University of Cambridge, Cambridge, United Kingdom

<sup>2</sup> Mel and Enid Zuckerman College of Public Health, University of Arizona, Tucson, USA

<sup>3</sup> Population Health Sciences Institute, Newcastle University, Newcastle upon Tyne, UK

<sup>4</sup> Department of Public Health and Primary Care, University of Cambridge, Cambridge, United Kingdom

**Corresponding Author:** John Ford, Cambridge Institute of Public Health, University of Cambridge, Forvie Site, Robinson Way, Cambridge CB2 0SR, United Kingdom ([jf653@medschl.cam.ac.uk](mailto:jf653@medschl.cam.ac.uk))

**Manuscript word count:** 3219

**Number of figures:** 1

**Number of tables:** 3

**Supplement materials:** 1 table

**Funding statement:** This research received no specific grant from any funding agency in the public, commercial or not-for-profit sectors. Kim van Daalen is funded by the Gates Cambridge Scholarship (OPP1144). Claire Norman holds an extended Academic Integrated Training Post funded by a Health Education England North East.

**Competing interest statement:** The authors have no competing interests to declare.

**Patient consent:** None required.

**Provenance and peer review:** Not commissioned; externally peer reviewed.

**Data sharing statement:** There are no additional data available.

**Author's contributions:** JF conceptualized the study supported by KvD, FD and CN. All authors discussed the results and contributed to the final manuscript. JF is the guarantor.

**Patient and Public Involvement:** Patients or the public were not involved in the design, or conduct, or reporting, or dissemination plans of our research.

**Ethical approval statement:** not applicable.

**Acknowledgements:** We would like to thank Isla Kuhn for her expertise on the search strategy and extraction from articles from the databases.

**Abstract**

*Objectives:* The purpose of this systematic review is to explore whether health equity audits (HEA) are effective in improving the equity of service provision and reducing health inequalities.

*Design:* Three databases (Ovid Medline, Embase, Web of Science) and grey literature (Opengrey, Google Scholar) were systematically searched for articles published after 2000, reporting on the effectiveness of health equity audits. Title and abstracts were screened according to an eligibility criteria to identify studies which included a full audit cycle (e.g. initial equity analysis, service changes and review). Data were extracted from studies meeting the eligibility criteria after full text review and risk of bias assessed using the ROBINS-I tool. The study was registered prior to its conduction in PROSPERO (CRD 42020218642).

*Results:* The search strategy identified 596 articles. Fifteen records were reviewed in full-text and three records were included in final review. An additional HEA report was identified through contact with an author. Three different HEAs were included from one peer-reviewed journal article, two published reports and one unpublished report (n= 4 records on n=3 HEAs). This included 102,851 participants and over 148 practices/pharmacies (information was not recorded for all records). One study reviewed health equity impacts of HEA implementation in key indicators for coronary heart disease, type 2 diabetes, and chronic obstructive pulmonary disease. Two HEAs explored Stop Smoking Services on program access and equity. All reported some degree of reduction in health inequalities compared to prior HEA implementation. However, impact of HEA implementation compared to other concurrent programmes and initiatives was unclear. All included studies were judged to have moderate to serious risk of bias.

*Conclusions*

1  
2  
3 1 There is an urgent need to identify effective interventions to address health  
4  
5 2 inequalities. While HEAs are recommended, we only identified limited weak  
6  
7 3 evidence to support their use. More evidence is needed to explore whether HEA  
8  
9 4 implementation can reduce inequalities and which factors are influencing  
10  
11 5 effectiveness.  
12  
13  
14 6  
15  
16 7

### 17 **Strengths and limitations of this study**

- 18  
19 8 • This systematic review represents, to our knowledge, the most  
20  
21 9 comprehensive examination of the evidence on the effectiveness of  
22  
23 10 health equity audits (HEA) used to reduce inequalities in service provision  
24  
25 11 and clinical outcomes  
26  
27  
28 12 • A broad, prospectively published rigorous search strategy (registered in  
29  
30 13 PROSPERO) - that included non-English articles and grey literature – was  
31  
32 14 used.  
33  
34  
35 15 • All included studies were judged to be of moderate or serious risk of bias.  
36  
37 16 • The study design of the included studies meant that we were unable to  
38  
39 17 assess the impact of concurrent programmes of work.  
40  
41  
42  
43  
44  
45  
46  
47  
48  
49  
50  
51  
52  
53  
54  
55  
56  
57  
58  
59  
60

### 19 **Keywords**

20 Health Equity Audits, Equity, Public Health, Intervention

## 1 Introduction

2  
3  
4  
5 2 The COVID-19 pandemic has exposed and exacerbated structural, longstanding  
6  
7  
8 3 and unjust drivers of health inequalities, including economic disparities,  
9  
10 4 geographical deprivation, occupational risks and systematic racism.<sup>1</sup> In the United  
11  
12 5 Kingdom, the most deprived areas of the country saw a 118% increased death rate  
13  
14 6 from COVID-19 compared with the least deprived.<sup>2</sup> Likewise, there have been  
15  
16 7 striking inequalities across minority ethnic groups with people from Pakistan and  
17  
18 8 Bangladesh living in the UK having higher death rates in both the first and second  
19  
20 9 waves.<sup>3</sup> However, the inequalities directly related to COVID-19 are likely to be  
21  
22  
23 10 overshadowed by the inequalities across, for example, socio-economic, ethnic and  
24  
25 11 gender strata that will indirectly arise from the pandemic's impact on education,  
26  
27  
28 12 income, welfare, investment, social care and health care.<sup>1</sup> COVID-19 has also  
29  
30 13 compounded existing healthcare inequalities. During 2019-20, the most deprived  
31  
32 14 decile had 7% fewer elective admissions than the least, but 51% more emergency  
33  
34 15 admissions.<sup>4</sup> Whilst there is now a significant body of data and research describing  
35  
36  
37 16 the problem of health inequalities, there has limited research and data showing  
38  
39 17 what interventions could reduce them and ensure a fair distribution of health  
40  
41 18 resources.

42  
43 19  
44  
45 20 In response to the emerging inequalities related to COVID-19, Public Health  
46  
47 21 England recommended the use of Health Equity Audits (HEA).<sup>5</sup> HEA is a tool  
48  
49 22 conducted by public health professionals and/or screening providers to measure  
50  
51 23 and address inequalities in the provision of and access to services, related health  
52  
53 24 outcomes and determinants of health between different population groups. They  
54  
55 25 are conducted to address inequalities by providing evidence to show whether local  
56  
57 26 health needs are being met, to identify service delivery practices and to ensure  
58  
59  
60

1 resources are distributed equitably (resources are distributed fairly in relation to  
2 need, not necessarily equally). HEAs typically use a sequential audit design in which  
3 they collect data on the relevant health and health services outcomes, and  
4 inequalities across a range of different factors (e.g. socio-economic differences,  
5 area or regional variations, ethnicity, sexuality). The audits are tailored to specific  
6 health outcomes/services and are often supplemented with published data on e.g.  
7 screening performance. Compared to other countries the UK has been the  
8 predominant implementer of HEAs, although they have also been used in other  
9 countries (e.g. Canada<sup>6</sup>, Iran<sup>7</sup> and Italy<sup>8</sup>). Examples include an equity audit of the  
10 Health Check programme which found lower uptake in men - especially younger  
11 men in deprived areas, and those on the learning disability or severe mental illness  
12 register.<sup>9</sup> Furthermore, an equity audit on a diabetic retinopathy screening  
13 programme, found that screening was lower in more deprived areas.<sup>10</sup>

14  
15 HEAs are not a new initiative. In 2002, as part of the UK national health inequalities  
16 strategy, HEAs were recommended for all local health systems to address health  
17 inequalities. At that time the use of them became widespread, until 2010 when a  
18 change in the UK Government led to the cessation of many health inequalities  
19 initiatives, in response to the 2008 recession and financial constraint. Their use was  
20 further reduced after significant health care reforms in England in 2013.<sup>11,12</sup> More  
21 recently, a number of equity audits have been undertaken in local health systems  
22 and their utilisation is likely to continue expanding in response to the COVID-19  
23 pandemic.

24  
25 Despite the extensive use of HEAs in the past and current recommendations, there  
26 is little research on their effectiveness or on the aspects that could make HEAs

1  
2  
3 1 successful. Therefore, the aim of this study was to assess the effectiveness of HEAs  
4  
5 2 in reducing inequalities and increasing equity, and to explore factors influencing  
6  
7 3 effectiveness. Importantly we focus on studies with a full audit cycle; those that  
8  
9  
10 4 assess existing inequalities, implement changes/interventions to achieve equity  
11  
12 5 and re-assess inequalities, rather than those studies which only describe the  
13  
14 6 inequalities and make recommendations.  
15  
16  
17 7

## 18 8 **Methods**

19  
20  
21 9 We conducted a systematic review in accordance with established methodology<sup>13</sup>  
22  
23 10 and reported in line with the Preferred Reporting for Systematic Reviews and  
24  
25 11 Meta-analyses (PRISMA) statement.<sup>14</sup> This review was prospectively registered and  
26  
27  
28 12 published with PROSPERO (CRD 42020218642).  
29  
30  
31 13

### 32 14 *Search strategy and selection criteria*

33  
34 15 Three electronic databases (Ovid Medline, Embase, Web of Science) and grey  
35  
36 16 literature (Opengrey, Google Scholar) were systematically searched from 2000 to  
37  
38 17 February 2021 drawing upon existing inequality and inequity related search terms.  
39  
40 18 Search terms included those related to audits and inequity (e.g. equity, access,  
41  
42 19 equality), see **supplementary table 1**. We applied forward (a search to find all of  
43  
44 20 the articles that cite back to an article) and backward (a search to find all the cited  
45  
46 21 references in an article) screening of all full text publications included and relevant  
47  
48 22 publications (e.g. reviews and reports). After removing duplicate records, abstracts  
49  
50 23 and titles were double-screened according to the selection criteria by two  
51  
52 24 researchers (KvD, FD) using the software Rayyan by March 2021. Discrepancies  
53  
54 25 were resolved by a third researcher (JF). Inclusion criteria were i) reporting on  
55  
56 26 audits of health equity, ii) focused on health settings, iii) assessing the effectiveness  
57  
58  
59  
60



1 of the audit on reducing health inequalities, iv) any study design and v) articles in  
2 English, Dutch, German, French and Spanish. Studies were excluded if they were i)  
3 published before 2000, ii) solely described the audit protocol and iii) did not assess  
4 the effectiveness of the audit, but only the results of the initial inequality  
5 assessment. All full texts for studies that satisfied the selection criteria were  
6 retrieved and double-screened. Any divergences between authors on study  
7 eligibility were discussed until consensus was reached.

8  
9 Data from included studies were independently extracted by two researchers (KvD,  
10 FD). A third researcher resolved any conflicts (CN). The following information was  
11 extracted from each study: first author, year of publication, country, aim, study  
12 design, data source, population characteristics (e.g. size), inequality measures (e.g.  
13 gender, socioeconomic), health service changes, time of data collection, summary  
14 of audit performed, and main findings. Terms/categories conflating race and  
15 ethnicity are used throughout the paper as a consequence of being commonly used  
16 in the health equity audits and subsequent data collection, but we acknowledge  
17 that race and ethnicity are different social concepts. Study authors were contacted  
18 for more information where relevant.

### 19 20 *Quality Assessment*

21 Two authors (KvD, FD) independently assessed the quality of individual studies  
22 using the ROBINS-I tool, which assess the risk of bias across seven domains  
23 (<https://www.riskofbias.info/>).<sup>15</sup> Discrepancies between authors were adjudicated  
24 by two authors (JF, CN). Due to the small number of studies it was deemed  
25 inappropriate to perform a GRADE assessment.

### *Synthesis*

The conduct of meta-analyses or the assessment of publication bias was deemed inappropriate due to the limited number of studies and data heterogeneity. Therefore, the studies were synthesised narratively.

### *Patient and public involvement*

Due to the nature of the study (systematic review, no patients were involved in conceptualising or conducting the study.

### **Results**

After removal of duplicates our search identified 596 records. Fifteen records were reviewed in full text and three records were included in the final review. An additional follow-up report on a same HEA was identified through contact with an author. This resulted in a total of four included records on three different HEAs. A flow diagram of the screening and selection process can be found in **figure 1**. We included two HEAs<sup>16,17,18</sup> reviewing Stop Smoking Services on program access and equity arising from two published and one unpublished report, and one peer-reviewed intervention study<sup>19</sup> reviewing health equity impacts of HEA implementation in key indicators for coronary heart disease (CHD), type 2 diabetes (DMT2), and chronic obstructive pulmonary disease (COPD) (**Table 1**). All included records were conducted in the United Kingdom and utilised a sequential audit design. Across all included HEA there were participants from 148 general practices in London (Newham, City and Hackney, Tower Hamlets) and from general practices and pharmacies participating in the two county Stop Smoking Service programs in Durham and Lewisham, including a total of 102,851 individuals. Data were collected between 2007 and 2017. The included HEAs assessed various inequalities

1  
2  
3 1 (including inequalities in ethnicity, gender, age, socio-economic group, and  
4  
5 2 location) in service delivery, service access and health outcomes.<sup>16,17,19,18</sup>  
6  
7  
8 3

9  
10 4 The majority of published literature on HEAs were one cycle HEA reports that did  
11  
12 5 not assess HEA effectiveness; we identified 56 records which reported only one  
13  
14 6 HEA cycle from grey literature (n=43) and electronic databases (n=13). The majority  
15  
16 7 of these (n=23) were conducted by local governments, local health care systems  
17  
18 8 (n=21), or combinations of the former (n=4). A minority were carried out by  
19  
20 9 hospitals (n=3), dental services (n=3) or by national health care organisations (n=2).  
21  
22  
23 10 A wide range of services were audited, but the most common were smoking  
24  
25 11 cessation services (n=7), cancer screening (n=7) and health promotion  
26  
27 12 programmes (NHS Health Checks) (n=6).  
28  
29  
30 13

#### 31 32 14 *Health Equity Audit implementation*

33  
34 15 Badrick *et al.* implemented and evaluated HEAs in 38 practices in Tower Hamlets  
35  
36 16 Primary Care Trusts (PCT) which included facilitation sessions encouraging change,  
37  
38 17 identifying areas of expressed difficulty and engaging teams in finding solutions. The  
39  
40 18 intervention tracked four key indicators (blood pressure and haemoglobin A1c levels  
41  
42 19 in DMT2, % smoking in COPD and cholesterol levels in CHD). Changes in performance  
43  
44 20 over time were then examined for the intervention PCTs compared to neighbouring  
45  
46 21 non-intervention PCTs (n=110).<sup>19</sup> Roe *et al.*<sup>16,18</sup> and Pringle *et al.*<sup>17</sup> used a before-  
47  
48 22 and-after comparison rather than the inclusion of a comparison site. Roe *et al.*<sup>16,18</sup>  
49  
50 23 assessed the Durham NHS Stop Smoking Service's impact on health inequalities.  
51  
52 24 They explored the rate of access and rate of quitters providing a comparison with  
53  
54 25 audits conducted in 2007, 2014 and 2018. Slope and Relative Indices of Inequality  
55  
56 26 were calculated by the socio-economic dimension to inequalities in health.<sup>16,18</sup>  
57  
58  
59  
60

1  
2  
3  
4  
5  
6  
7  
8  
9  
10  
11  
12  
13  
14  
15  
16  
17  
18  
19  
20  
21  
22  
23  
24  
25  
26  
27  
28  
29  
30  
31  
32  
33  
34  
35  
36  
37  
38  
39  
40  
41  
42  
43  
44  
45  
46  
47  
48  
49  
50  
51  
52  
53  
54  
55  
56  
57  
58  
59  
60

1 Similarly, Pringle *et al.* compared differences in access and quitting success rates  
2 through the Lewisham NHS Stop Smoking Service between 2000-2005 (first HEA)  
3 and 2007/8-2011/12 (second HEA).<sup>17</sup>

For peer review only

1  
2  
3 **1 Table 1: Study characteristics**4  
5  
6  
7  
8  
9  
10  
11  
12  
13  
14  
15  
16  
17  
18  
19  
20  
21  
22  
23  
24  
25

| First author, year and country                                 | Aim                                                                                                                                                                                                                                                                                                                                   | Study design      | Data sources                                                                                                                                                                                                                                                                                                                                                                | Population                                                                                                                          | Inequality measures (e.g. SES, gender)                                                                                                                                                          | Resulting recommendations for service delivery changes                                                                                                                                                                                                                                                                                                                                                                                                                                                                | Time between data collection                                                                                                               |
|----------------------------------------------------------------|---------------------------------------------------------------------------------------------------------------------------------------------------------------------------------------------------------------------------------------------------------------------------------------------------------------------------------------|-------------------|-----------------------------------------------------------------------------------------------------------------------------------------------------------------------------------------------------------------------------------------------------------------------------------------------------------------------------------------------------------------------------|-------------------------------------------------------------------------------------------------------------------------------------|-------------------------------------------------------------------------------------------------------------------------------------------------------------------------------------------------|-----------------------------------------------------------------------------------------------------------------------------------------------------------------------------------------------------------------------------------------------------------------------------------------------------------------------------------------------------------------------------------------------------------------------------------------------------------------------------------------------------------------------|--------------------------------------------------------------------------------------------------------------------------------------------|
| Badrick, E. <i>et al.</i> (2014), United Kingdom <sup>19</sup> | The main aim of the study was to describe the development and implementation of practice equity audits, and an evaluation of changing inequalities over time for three project conditions in inner east London.                                                                                                                       | Sequential audits | Routine clinical and demographic data were collected from practice computer databases, using Morbidity Information Query and Export Syntax (MIQUEST) software and EMIS Web (Egton Medical Information Systems Ltd, 2010) from 148 of the 151 general practices in the three areas of London.                                                                                | Three areas of London (Newham, City and Hackney and Tower Hamlets) with a combined GP-registered population of 829,710 in mid-2008. | Association between self-reported ethnicity, gender, age-band and four key indicators (cholesterol levels in CHD, blood pressure and haemoglobin A1c levels in diabetes and % smoking in COPD). | 38 practices in the intervention arm (Tower Hamlets) received two health equity audits and facilitated time with a cardiovascular nurse specialist to review their results. The study authors recommended prioritizing monitoring inequalities by age, gender, and ethnic group; balancing rigorous, complete reports with simple, brief reports for reaching increased practice audiences; and implementation of HEA facilitation tailored to practice setting and needs to promote changes in clinical performance. | Cross-sectional data were extracted in April of every year between 2007 and 2010 for all patients on the CHD, diabetes and COPD registers. |
| Pringle, E. (2013), United Kingdom <sup>17</sup>               | This health equity audit looks at the use and success of Lewisham's Stop Smoking Service from April 2007 to March 2012 by age, gender, ethnicity, socioeconomic group and location. In addition, the views of a small number of service users and advisers were sought on factors that may affect the use and success of the service. | Sequential audits | Smoking prevalence data is available from the Integrated Household Survey (IHS) which combines answers from a number of Office for National Statistics (ONS) surveys containing questions about smoking. Interviews with 15 smokers and 6 advisers. Quits dates set from April 1st 2007 to March 31st 2012 were extracted from Quit Manager. Smoking data is self-reported. | Lewisham residents accessing Stop Smoking services.                                                                                 | Association between age, gender, ethnicity, socioeconomic group, and location and service access rates and successful smoking cessation rates.                                                  | The HEA recommended adjusting marketing messages, targeting specific underrepresented groups, collaborating with African American churches to implement Stop Smoking Services, exploring use of innovative technology especially with young smokers, reallocating level 3 advisers to the underrepresented groups who benefit most from their counseling, and undertaking further research on groups not examined in the HEA                                                                                          | April 2007 to March 2012.                                                                                                                  |

1  
2  
3  
4  
5  
6  
7  
8  
9  
10  
11  
12  
13  
14  
15  
16  
17  
18  
19  
20  
21  
22  
23  
24  
25  
26  
27  
28  
29  
30  
31  
32  
33  
34  
35  
36  
37  
38  
39  
40  
41  
42  
43  
44  
45  
46

|                                                           |                                                                                                                                                                                                                                                                                                                                                                                                                                                                                                           |                   |                                                                                                                                                                                                                                                                                                                                                                   |                                                                              |                                                                                                                                                                              |                                                                                                                                                                                                                                                                  |                                   |
|-----------------------------------------------------------|-----------------------------------------------------------------------------------------------------------------------------------------------------------------------------------------------------------------------------------------------------------------------------------------------------------------------------------------------------------------------------------------------------------------------------------------------------------------------------------------------------------|-------------------|-------------------------------------------------------------------------------------------------------------------------------------------------------------------------------------------------------------------------------------------------------------------------------------------------------------------------------------------------------------------|------------------------------------------------------------------------------|------------------------------------------------------------------------------------------------------------------------------------------------------------------------------|------------------------------------------------------------------------------------------------------------------------------------------------------------------------------------------------------------------------------------------------------------------|-----------------------------------|
|                                                           |                                                                                                                                                                                                                                                                                                                                                                                                                                                                                                           |                   |                                                                                                                                                                                                                                                                                                                                                                   |                                                                              |                                                                                                                                                                              |                                                                                                                                                                                                                                                                  |                                   |
| Roe, K. (2018), United Kingdom <sup>16</sup>              | The purpose of these reports is to assess whether the County Durham NHS Stop Smoking Service is having an impact on health inequalities. It aims to identify how services are delivered relative to the deprivation levels across County Durham and provide analysis by the two Clinical Commissioning Groups within its borders. The reports analyse the rate of access and rate of quitters. This Health Equity Audit (HEA) also provides a comparison with previous audits conducted in 2007 and 2014. | Sequential audits | Source of the data is Durham County Council Public Health Intelligence Team (DCCPHIT). The raw data for the 2014 and 2018 HEAs is taken from Quit manager; a Stop Smoking Service web-based patient data management system. The 2007 data was collated from 5 different reports from localities within Co. Durham and the source of the quit dates is not stated. | 2014 – Durham residents accessing Stop Smoking services, 23,350 used records | Deprivation was measured at small area level and the Relative Index of Inequality (Rii) and the Slope Index of Inequality (Sii) were used to compare inequalities over time. | The HEA recommended targeting specific groups of people including routine and manual workers, Gypsy, Roma and Travellers (GRT), pregnant women, people with a diagnosed mental illness, long term conditions and people who live in the 30% most deprived areas. | 2014 - January 2011 to March 2013 |
| Roe, K. <i>et al</i> (2014), United Kingdom <sup>18</sup> |                                                                                                                                                                                                                                                                                                                                                                                                                                                                                                           |                   |                                                                                                                                                                                                                                                                                                                                                                   | 2018 – Durham residents accessing Stop Smoking Services, 9,240 used records  |                                                                                                                                                                              |                                                                                                                                                                                                                                                                  | 2018 - April 2015 to March 2017   |

1  
2  
3 1 *Changes in inequalities during audit period*

4  
5 2 All HEAs reported baseline inequitable outcomes in physical health outcomes<sup>19</sup>,  
6  
7 3 health behaviours, and access to or utilisation of health services by age, gender,  
8  
9  
10 4 ethnicity, socio-economic status and location.<sup>16,17,18</sup> During the audit period,  
11  
12 5 some degree of reduced inequality was observed in all records compared to the  
13  
14 6 comparison group<sup>19</sup> or prior HEA data (**Table 2**).<sup>16,17,18</sup> In Tower Hamlets' PCTs,  
15  
16 7 reductions in gender and age group differences were found in DMT2 and CHD.  
17  
18 8 Yet, whilst all ethnic groups showed improvement over the years of HEA  
19  
20 9 implementation, there was no reduction in difference between ethnic groups.  
21  
22  
23 10 Furthermore, some groups showed a widening of inequalities. For example, in  
24  
25 11 the CHD register South Asians increased from being 1.9 (1.6-2.2) times more  
26  
27  
28 12 likely than White groups to have cholesterol levels < 4 mmol/L in 2007 to being  
29  
30 13 to 2.4 (2.0-2.8) more likely in 2010.

31  
32 14  
33  
34 15 Similarly, smoking rates in COPD indicate increased disparity between White and  
35  
36 16 other ethnic groups in 2010.<sup>19</sup> The audit of the Lewisham Stop Smoking Service  
37  
38 17 found an increase in service access by 'black and ethnic minority groups' as well  
39  
40 18 as by people from deprived areas (2007/2008 – 2011/12) as compared to prior  
41  
42 19 audits (2000-2005). However, the HEA report also identified several population  
43  
44 20 groups still underrepresented in access rates (e.g. younger smokers, older  
45  
46 21 women, Indian men, Chinese men, white Irish men and black African smokers)  
47  
48 22 and overall inequality in program access and success rates.<sup>17</sup> The 2014 Stop  
49  
50 23 Smoking Service HEA in County Durham found a reduction in health inequalities  
51  
52 24 compared to prior audits (2007) as demonstrated by a consistent increase in the  
53  
54 25 relative index of inequality, the size of the gap between the least and the most  
55  
56 26 deprived areas expressed as the average rate over all wards, for access and  
57  
58  
59  
60

1  
2  
3 1 smoking quit rates. Furthermore, a reduction in access rate to quit rate was  
4  
5 2 observed – gap of 69% to 16% in 2007 and 2014 respectively.<sup>16</sup> Reductions in the  
6  
7 3 inequality gaps were observed again in the 2018 HEA compared to the 2007 and  
8  
9 4 2014 HEAs.<sup>18</sup>

#### 10 4 11 5 12 6 13 7 14 7 *Study quality assessment*

15  
16 8 Study quality assessment was conducted using the ROBINS-I tool. Each included  
17  
18 9 record was found to have a serious or moderate risk of bias in the various  
19  
20 10 categories assessed (**Table 3**). Confounding may have influenced the results of  
21  
22 11 the reports due to the inadequacy of study designs to differentiate effectiveness  
23  
24 12 of HEA implementation from simultaneously implemented local improvement  
25  
26 13 initiatives, the “noise” of a changing NHS or other societal changes that may have  
27  
28 14 led to reduced or increased inequalities. The potential selection of health  
29  
30 15 practices that already established an equity-focus may have resulted in selection  
31  
32 16 bias, meaning that results may not be generalisable to most areas in the United  
33  
34 17 Kingdom. Likewise, as included studies have solely been performed in the UK  
35  
36 18 results may not be applicable to other countries.  
37  
38  
39  
40  
41  
42  
43  
44  
45  
46  
47  
48  
49  
50  
51  
52  
53  
54  
55  
56  
57  
58  
59  
60



1  
2  
3 **1 Table 2: Study results**4 **2**

| 5 <b>First author, year</b>                                                                                                        | 6 <b>Summary of audit</b>                                                                                                                                                                                                                                                                                                                                                    | 7 <b>Main findings</b>                                                                                                                                                                                                                                                                                                                                                                                                                                                                                                                                                                                                                                                                                                                                                                                                                                                                                                                                                                                                     |
|------------------------------------------------------------------------------------------------------------------------------------|------------------------------------------------------------------------------------------------------------------------------------------------------------------------------------------------------------------------------------------------------------------------------------------------------------------------------------------------------------------------------|----------------------------------------------------------------------------------------------------------------------------------------------------------------------------------------------------------------------------------------------------------------------------------------------------------------------------------------------------------------------------------------------------------------------------------------------------------------------------------------------------------------------------------------------------------------------------------------------------------------------------------------------------------------------------------------------------------------------------------------------------------------------------------------------------------------------------------------------------------------------------------------------------------------------------------------------------------------------------------------------------------------------------|
| 8 Badrick, E. <i>et al.</i><br>9 (2014), United<br>10 Kingdom <sup>19</sup>                                                        | 11 The audit aimed to reduce health inequalities by<br>12 ethnicity, age and gender in the management of<br>13 three common chronic diseases (coronary heart<br>14 disease, type 2 diabetes mellitus and chronic<br>15 obstructive pulmonary disease).                                                                                                                       | 16 Baseline inequalities in each condition across the three east London areas were identified. At a crude level, performance in cholesterol, BP and HbA1c improved in all areas over time. All ethnic groups showed improvement, but there was no evidence of a reduction in differences between ethnic groups.<br><br>17 Over the three-year study, a reduction in health inequalities was measured in some groups (such as patients over 85 years with diabetes) with only slight reductions in, continued, or worsened inequalities observed in most other groups. Compared to the neighbouring areas, Tower Hamlets (receiving the intervention) had smaller improvement levels in CHD, higher absolute changes in both diabetes measures, and small but similar changes in rates of smoking in COPD patients. The study reported positive GP responses to the intervention providing assistance in conducting/interpreting HEAs.<br><br>18 Reductions in gender and age group differences were noted in DMT2 and CHD. |
| 19 Pringle, E. (2013),<br>20 United Kingdom <sup>17</sup>                                                                          | 21 This health equity audit looks at the use and<br>22 success of Lewisham's Stop Smoking Service<br>23 from April 2007 to March 2012 by age, gender,<br>24 ethnicity, socioeconomic group and location. In<br>25 addition, the views of a small number of service<br>26 users and advisers were sought on factors that<br>27 may affect the use and success of the service. | 28 Since the last equity audit more smokers from 'black and ethnic minority groups' were using the service. In addition, this health equity audit shows that over the last five years the Stop Smoking Service was reaching an increasing number of people from deprived areas. More quit dates were set by smokers from deprived areas than from less deprived areas. Overall, this health equity audit shows inequality across Lewisham's smokers in the use and success of Lewisham's Stop Smoking Service in terms of the need for stop smoking services. The population groups that seemed to be underrepresented in their use of the service were: younger smokers, older women, Indian men, Chinese men, white Irish men and black African smokers. Additionally, smokers from more deprived areas, routine and manual workers, students and unemployed smokers were less likely to successfully quit smoking.                                                                                                      |
| 29 Roe, K. <i>et al.</i><br>30 (2014), United<br>31 Kingdom <sup>16</sup><br>32 Roe, K. (2018),<br>33 United Kingdom <sup>18</sup> | 34 This HEA assesses the distribution of the<br>35 Durham Stop Smoking Service (SSS) and its<br>36 effectiveness relative to deprivation levels<br>37 within County Durham and the two Clinical<br>38 Commissioning Groups (CCGs) within its<br>39 borders.                                                                                                                  | 40 2014 - Compared to the results of the 2007 HEA there has been an increase in the relative index of inequality for access and quit rates as well as a reduction in the difference between the two, indicating that the County Durham SSS is contributing to a reduction in health inequalities.<br><br>41 2018 - The County Durham SSS has been successful in contributing to a reduction in the equity gap, seeing a consistent increase in the relative index of inequality for access and quit rates. This was true for services accessed in pharmacies, primary care, and specialist Stop Smoking Service. The audit found a higher rate of pregnant smokers in more deprived areas, but also a higher quit rate for pregnant smokers who accessed the services in more deprived areas. This indicates that the County Durham Stop Smoking Service is contributing to a reduction in health inequalities.                                                                                                            |

44  
45  
46

Table 3: Risk of bias – ROBINS-I tool

| Study                                                          | Bias due to confounding | Bias due to selection of organisations into study | Bias in classification of interventions | Bias due to deviations from intended interventions | Bias due to missing data | Bias in measurement of outcomes | Bias in selection of reported result |
|----------------------------------------------------------------|-------------------------|---------------------------------------------------|-----------------------------------------|----------------------------------------------------|--------------------------|---------------------------------|--------------------------------------|
| Badrick, E. <i>et al.</i> (2014), United Kingdom <sup>19</sup> | Serious                 | Serious                                           | Low                                     | No information                                     | Low                      | Moderate                        | Low                                  |
| Pringle, E. (2013), United Kingdom <sup>17</sup>               | Serious                 | Serious                                           | Low                                     | No information                                     | Moderate                 | Moderate                        | Moderate                             |
| Roe, K. <i>et al.</i> (2014), United Kingdom <sup>16</sup>     | Serious                 | Serious                                           | Low                                     | No information                                     | Moderate                 | Moderate                        | Low                                  |
| Roe, K. (2018), United Kingdom <sup>18</sup>                   |                         |                                                   |                                         |                                                    |                          |                                 |                                      |

### Discussion

This systematic review represents, to our knowledge, the most comprehensive examination of the evidence on the effectiveness of health equity audits. We identified three HEAs<sup>16,17, 19, 18</sup> based in health care or public health settings with serious to moderate risk of bias. All showed the presence of baseline inequalities and found reductions in health inequalities across various strata in the subsequent years of initial HEAs. Only one study used comparison sites.<sup>19</sup>

### Meaning of the results

There has been little research undertaken to explore the effectiveness of HEAs, despite them being widely used in the UK during the 2000s and currently being recommended by PHE.<sup>5,11</sup> This may be because of methodological challenges in assessing effectiveness or an assumption that they are the right strategy. The majority of HEAs we identified only undertook one cycle, suggesting that practitioners tend to use HEAs as a tool to assess the existing inequalities within a service rather than a tool to record or reduce inequalities over time. Although HEAs may be useful at identifying areas of health inequality or greater need, without

1  
2  
3 1 repeating the data collection it is not possible to say whether the HEA resulted in  
4  
5 2 any meaningful service change or targeted intervention, let alone whether this  
6  
7 3 resulted in a reduction in inequities.  
8  
9

10 4  
11  
12 5 We only identified three HEAs that completed the audit cycle to assess if the  
13  
14 6 recommendations and changes resulted in a reduction in inequalities over time.  
15  
16 7 The lack of peer reviewed research assessing HEA effectiveness may reflect the lack  
17  
18 8 of health care and public health services to evaluate the impact and effectiveness  
19  
20 9 of decisions, with a much greater focus on addressing problems. It may also reflect  
21  
22 10 difficulties presented by frequently changing priorities and frequent turnover of  
23  
24 11 staff. Furthermore, a reluctance to publish HEAs may be present as they could  
25  
26 12 cause reputational damage to organisations or even a concern that the findings  
27  
28 13 may leave the organisation open to legal challenge under equality legislation.  
29  
30 14 Qualitative research around clinical audit has shown that audit is seen as “a time-  
31  
32 15 consuming, additional chore and a managerially driven exercise”<sup>20</sup> that is  
33  
34 16 hampered by a lack of resources, lack of expertise, lack of audit plan, and  
35  
36 17 organisational impediments.<sup>21</sup> Organisational change and austerity measures have  
37  
38 18 meant that local authority Public Health teams have faced increased  
39  
40 19 responsibilities and real-terms funding cuts.<sup>22</sup>  
41  
42  
43  
44  
45  
46  
47

48 21 The single peer-reviewed article was undertaken in a number of general practices  
49  
50 22 in London. The authors found that it was possible to undertake equity audits in  
51  
52 23 general practice using routine data. While all of the included studies identified  
53  
54 24 some reductions in health inequalities during the HEA process, only Badrick *et al.*  
55  
56 25 had a suitable comparison group. Furthermore, in the absence of randomised  
57  
58 26 intervention studies and further high-quality observational studies, attributing  
59  
60

1  
2  
3 1 changes in equities to HEAs based on the included reports is inappropriate due to  
4  
5 2 the potential confounding and biases introduced. No evidence was found to  
6  
7 3 suggest that HEAs result in harm or should not be undertaken in the absence of  
8  
9  
10 4 further evidence.  
11  
12 5

#### 13 14 6 *Comparison with existing literature*

15  
16 7 Aspinall and Jacobson<sup>23</sup> undertook a baseline survey in 2004 of practitioners'  
17  
18 8 experiences across England in the first HEA implementation year of undertaking  
19  
20 9 nationally mandated. The authors found that national target-setting, national  
21  
22  
23 10 guidance on self-assessment and the inclusion of HEAs within a ratings system  
24  
25 11 influenced whether the process and, in a significant minority, implementation of  
26  
27  
28 12 the findings of HEAs became part of healthcare systems' routine business.<sup>23</sup>  
29  
30 13

31  
32 14 There is a sizable body of research looking at the effectiveness of clinical audits  
33  
34 15 (i.e. non-equity focused). For example, a Cochrane review examined the impact  
35  
36  
37 16 of audit and feedback on professional behaviour. The authors identified 140  
38  
39 17 randomised controlled trials and found that audit and feedback has small but  
40  
41 18 important improvements in professionals behaviour.<sup>24</sup> Similarly there is  
42  
43 19 evidence for the use of quality improvement methods with some consideration  
44  
45 20 to equity. Lu *et al.* found that about a third of quality improvement projects in  
46  
47  
48 21 diabetes care included an equity perspective.<sup>25</sup>  
49  
50 22

51  
52 23 However, these findings are not necessarily transferable to HEAs as clinical  
53  
54 24 audits and quality improvement programmes are generally undertaken at a  
55  
56  
57 25 smaller organisation-level and focus on adherence to evidence-based best  
58  
59 26 practice guidance. HEAs are generally implemented at a higher organisational  
60

1  
2  
3 1 level, such as across a local government level or health care system, and it is not  
4  
5 2 always clear what actions are needed to reduce the inequalities gap. To illustrate,  
6  
7 3 Regmi *et al.* undertook a review of factors that support the reduction of  
8  
9 4 inequalities in local health care systems in the UK and found that there was little  
10  
11 5 evidence that local health care arrangements alone were effective in reducing  
12  
13 6 health inequalities.<sup>26</sup>  
14  
15  
16  
17 7

18  
19 8 However, there are a number of principles drawn from clinical audit and quality  
20  
21 9 improvement methods which may be effective in HEAs. Grimshaw *et al.* argue  
22  
23 10 for an implementation laboratory where there is a continual cycle of testing  
24  
25 11 different interventions and implementation strategies through audit and  
26  
27 12 feedback which may be effective in reducing health inequalities through HEA  
28  
29 13 implementation.<sup>27</sup>  
30  
31  
32  
33  
34  
35

### 36 15 *Strengths and limitations*

37 16 Our research used a prospectively published rigorous systematic review strategy  
38  
39 17 that included non-English articles and grey literature. We had a robust process  
40  
41 18 for screening titles/abstracts and full-texts, extracting data and determining the  
42  
43 19 risk of bias using a validated tool for quality assessment. However, only one HEA  
44  
45 20 with multiple years of data was found in the peer reviewed literature and all  
46  
47 21 reports included were of low to moderate quality. It is likely that there are a  
48  
49 22 number of HEAs not in the public domain. Yet, based on our research, most of  
50  
51 23 these are likely to only contain one HEA cycle. There may be a publication bias  
52  
53 24 towards studies reporting positive results (i.e. reductions in inequalities).  
54  
55 25 Importantly, as the reports included are sequential audits rather than well-  
56  
57 26 designed randomised studies, they may not have been equipped to differentiate  
58  
59  
60

1  
2  
3 1 HEA effectiveness from simultaneously implemented local improvement  
4  
5 2 initiatives, the “noise” of a changing NHS or other societal changes that may have  
6  
7 3 led to reduced or increased inequalities.  
8  
9

10 4  
11  
12 5 *Implications for research and policy*  
13

14 6 While the efforts to address inequalities in health care are not new, the impacts of  
15  
16 7 the pandemic have starkly delineated the imperative to do so. There is an urgent  
17  
18 8 need to find effective interventions to reduce health inequalities. Public Health  
19  
20 9 England recommends the use of HEAs and has published accompanying guidance  
21  
22 10 describing step-by-step processes of HEA implementation.<sup>5</sup> Yet, thus far, it is  
23  
24 11 unclear whether this has been supported by scientific evidence. It is likely that  
25  
26 12 there are key factors that will make HEA undertaking effective in inequality  
27  
28 13 reduction and factors that will not. For example, previous research has found that  
29  
30 14 audits tend to be more effective when feedback is given by respected colleagues,  
31  
32 15 there is frequent data presentation, both goals and action-plans are included and  
33  
34 16 the recipients are non-physicians.<sup>28</sup> Therefore, further well-designed studies with  
35  
36 17 suitable comparison groups are essential to further inform on the effectiveness of  
37  
38 18 HEAs. Process evaluation is needed to understand the factors that optimise HEA  
39  
40 19 effectiveness and implementation processes. Decision-makers may be more likely  
41  
42 20 to change behaviour based on case examples of how HEAs have been used to  
43  
44 21 reduce inequalities.  
45  
46 22

47  
48 23 While there is limited evidence for use of HEAs, we do believe that they should still  
49  
50 24 be used until further research is undertaken because we did not find any evidence  
51  
52 25 of harm and there is a logical rationale by which they could reduce inequalities.  
53  
54 26 The priority for policy makers is evaluating ongoing HEA and generating the  
55  
56  
57  
58  
59  
60

1  
2  
3 1 evidence base to understand if they work and, if so, what makes them most  
4  
5 2 effective.  
6  
7  
8 3

9  
10 4 **Conclusion**

11  
12 5 Research and practice demonstrate that meaningfully impacting inequalities in both health  
13  
14 6 outcomes and healthcare delivery is a complicated, challenging task faced by already  
15  
16 7 overburdened and under-resourced health systems. Whilst HEA implementation is  
17  
18 8 currently recommended, evidence for their effectiveness in reducing inequalities is sparse.  
19  
20 9 This evidence gap requires action. Efforts to reduce inequalities must neither be avoided  
21  
22 10 nor delayed because of their complicated nature; nor should they be undertaken  
23  
24 11 haphazardly without much needed, evidence-based guidelines. Further research is needed  
25  
26 12 to assess their effectiveness and understand what makes them effective (or not).  
27  
28  
29

30 13  
31 14 **References**

- 32  
33 15 1. Bamba C, Riordan R, Ford J, Matthews F. The COVID-19 pandemic and health inequalities. *J*  
34  
35 16 *Epidemiol Community Health*. 2020;74(11):964-968. doi:10.1136/jech-2020-214401  
36  
37 17 2. Deaths involving COVID-19 by local area and socioeconomic deprivation - Office for National  
38  
39 18 Statistics. Accessed April 21, 2021.  
40  
41 19 [https://www.ons.gov.uk/peoplepopulationandcommunity/birthsdeathsandmarriages/deaths](https://www.ons.gov.uk/peoplepopulationandcommunity/birthsdeathsandmarriages/deaths/bulletins/deathsinvolvingcovid19bylocalareasanddeprivation/deathsoccurringbetween1marchand31may2020)  
42  
43 20 [/bulletins/deathsinvolvingcovid19bylocalareasanddeprivation/deathsoccurringbetween1mar](https://www.ons.gov.uk/peoplepopulationandcommunity/birthsdeathsandmarriages/deaths/bulletins/deathsinvolvingcovid19bylocalareasanddeprivation/deathsoccurringbetween1marchand31may2020)  
44  
45 21 [chand31may2020](https://www.ons.gov.uk/peoplepopulationandcommunity/birthsdeathsandmarriages/deaths/bulletins/deathsinvolvingcovid19bylocalareasanddeprivation/deathsoccurringbetween1marchand31may2020)  
46  
47 22 3. Nafilyan V, Islam N, Mathur R, et al. *Ethnic Differences in COVID-19 Mortality during the First*  
48  
49 23 *Two Waves of the Coronavirus Pandemic: A Nationwide Cohort Study of 29 Million Adults in*  
50  
51 24 *England*. Cold Spring Harbor Laboratory Press; 2021. doi:10.1101/2021.02.03.21251004  
52  
53 25 4. Hospital Admitted Patient Care Activity 2019-20 - NHS Digital. Accessed April 21, 2021.  
54  
55 26 <https://digital.nhs.uk/data-and-information/publications/statistical/hospital-admitted->  
56  
57  
58  
59  
60

- 1  
2  
3 1 patient-care-activity/2019-20  
4  
5 2 5. United Kingdom Government. Health Equity Assessment Tool (HEAT): executive summary.  
6  
7 3 Accessed February 28, 2021. [https://www.gov.uk/government/publications/health-equity-](https://www.gov.uk/government/publications/health-equity-assessment-tool-heat/health-equity-assessment-tool-heat-executive-summary)  
8  
9 4 [assessment-tool-heat/health-equity-assessment-tool-heat-executive-summary](https://www.gov.uk/government/publications/health-equity-assessment-tool-heat/health-equity-assessment-tool-heat-executive-summary)  
10  
11 5 6. *The Health Care Equity Audit Guide.*; 2014. Accessed May 7, 2021. [www.communityview.ca](http://www.communityview.ca)  
12  
13 6 7. Karimi S, Moghadam SAHZ. Designing a health equity audit model for Iran in 2010. *J Res Med*  
14  
15 7 *Sci.* 2011;16(4):541-552. Accessed February 28, 2021.  
16  
17 8 <http://www.ncbi.nlm.nih.gov/pubmed/22091272>  
18  
19 9 8. Salomone M, Canavese C, Bérghamo D, et al. Guidelines audit may overcome disparities in  
20  
21 10 health care: experience of an Italian region. *J Nephrol.* Published online 2006.  
22  
23 11 9. Derbyshire County Council. *Health Equity Audit NHS Health Check Programme in Derbyshire*  
24  
25 12 *County.*; 2015. <https://www.healthcheck.nhs.uk/seecmsfile/?id=350>  
26  
27 13 10. Fraser S, Watkinson, Rennie, et al. Sociodemographic differences in diabetic retinopathy  
28  
29 14 screening; using patient-level primary care data for health equity audit. *Clin Audit.* 2011;3:7.  
30  
31 15 [doi:10.2147/CA.S25313](https://doi.org/10.2147/CA.S25313)  
32  
33 16 11. Barr B, Higgerson J, Whitehead M. Investigating the impact of the English health inequalities  
34  
35 17 strategy: Time trend analysis. *BMJ.* 2017;358. [doi:10.1136/bmj.j3310](https://doi.org/10.1136/bmj.j3310)  
36  
37 18 12. Timmins N. *Never Again? The Story of the Health and Social Care Act 2012.*; 2012. Accessed  
38  
39 19 May 7, 2021.  
40  
41 20 <https://www.instituteforgovernment.org.uk/sites/default/files/publications/Never>  
42  
43 21 [again\\_0.pdf](https://www.instituteforgovernment.org.uk/sites/default/files/publications/Never)  
44  
45 22 13. Cochrane Handbook for Systematic Reviews of Interventions | Cochrane Training. Accessed  
46  
47 23 May 7, 2021. <https://training.cochrane.org/handbook>  
48  
49 24 14. Moher D, Liberati A, Tetzlaff J, Altman DG. Preferred reporting items for systematic reviews  
50  
51 25 and meta-analyses: The PRISMA statement. *BMJ.* 2009;339(7716):332-336.  
52  
53 26 [doi:10.1136/bmj.b2535](https://doi.org/10.1136/bmj.b2535)  
54  
55  
56  
57  
58  
59  
60



- 1  
2  
3 1 15. Sterne JA, Hernán MA, Reeves BC, et al. ROBINS-I: A tool for assessing risk of bias in non-  
4  
5 2 randomised studies of interventions. *BMJ*. 2016;355. doi:10.1136/bmj.i4919  
6  
7 3 16. Roe K, Woodall D FMA. *Health Equity Audit of County Durham NHS Stop Smoking Services*.;  
8  
9 4 2014.  
10  
11 5 17. Pringle E. *Health Equity Audit of Lewisham's Stop Smoking Service 2007-2012*.; 2013.  
12  
13 6 18. Roe K. *A Health Equity Audit of County Durham NHS Stop Smoking Services 2018*.; 2018.  
14  
15 7 19. Badrick E, Hull S, Mathur R, et al. Health equity audits in general practice: a strategy to reduce  
16  
17 8 health inequalities. *Prim Health Care Res Dev*. 2014;15(1):80-95.  
18  
19 9 doi:10.1017/S1463423612000606  
20  
21 10 20. Bowie P, Bradley NA, Rushmer R. Clinical audit and quality improvement - Time for a rethink?  
22  
23 11 *J Eval Clin Pract*. 2012;18(1):42-48. doi:10.1111/j.1365-2753.2010.01523.x  
24  
25 12 21. Johnston G, Crombie IK, Davies HTO, Alder EM, Millard A. Reviewing audit: Barriers and  
26  
27 13 facilitating factors for effective clinical audit. *Qual Heal Care*. 2000;9(1):23-36.  
28  
29 14 doi:10.1136/qhc.9.1.23  
30  
31 15 22. David Buck. *The English Local Government Public Health Reforms: An Independent*  
32  
33 16 *Assessment*.; 2020. Accessed February 28, 2021. [www.kingsfund.org.uk](http://www.kingsfund.org.uk)  
34  
35 17 23. Aspinall PJ, Jacobson B. Managing health inequalities locally: A baseline survey of primary  
36  
37 18 care trusts' experience with health equity audit in the implementation year. *Heal Serv Manag*  
38  
39 19 *Res*. 2005;18(4):223-231. doi:10.1258/095148405774518606  
40  
41 20 24. Ivers N, Jamtvedt G, Flottorp S, et al. Audit and feedback: Effects on professional practice and  
42  
43 21 healthcare outcomes. *Cochrane Database Syst Rev*. 2012;2012(6).  
44  
45 22 doi:10.1002/14651858.CD000259.pub3  
46  
47 23 25. Lu JB, Danko KJ, Elfassy MD, Welch V, Grimshaw JM, Ivers NM. Do quality improvement  
48  
49 24 initiatives for diabetes care address social inequities? Secondary analysis of a systematic  
50  
51 25 review. *BMJ Open*. 2018;8(2):18826. doi:10.1136/bmjopen-2017-018826  
52  
53 26 26. Regmi K, Mudyarabikwa O. A systematic review of the factors - barriers and enablers -  
54  
55  
56  
57  
58  
59  
60

- 1  
2  
3 1 affecting the implementation of clinical commissioning policy to reduce health inequalities in  
4  
5 2 the National Health Service (NHS), UK. *Public Health*. 2020;186:271-282.  
6  
7 3 doi:10.1016/j.puhe.2020.07.027  
8  
9  
10 4 27. Grimshaw JM, Ivers N, Linklater S, et al. Reinvigorating stagnant science: Implementation  
11  
12 5 laboratories and a meta-laboratory to efficiently advance the science of audit and feedback.  
13  
14 6 *BMJ Qual Saf*. 2019;28(5):416-423. doi:10.1136/bmjqs-2018-008355  
15  
16 7 28. Ivers NM, Grimshaw JM, Jamtvedt G, et al. Growing Literature, Stagnant Science? Systematic  
17  
18 8 Review, Meta-Regression and Cumulative Analysis of Audit and Feedback Interventions in  
19  
20 9 Health Care. *J Gen Intern Med*. 2014;29(11):1534-1541. doi:10.1007/s11606-014-2913-y  
21  
22  
23  
24  
25  
26  
27  
28  
29  
30  
31  
32  
33  
34  
35  
36  
37  
38  
39  
40  
41  
42  
43  
44  
45  
46  
47  
48  
49  
50  
51  
52  
53  
54  
55  
56  
57  
58  
59  
60

**Figure 1:** Study selection process

For peer review only

1  
2  
3  
4  
5  
6  
7  
8  
9  
10  
11  
12  
13  
14  
15  
16  
17  
18  
19  
20  
21  
22  
23  
24  
25  
26  
27  
28  
29  
30  
31  
32  
33  
34  
35  
36  
37  
38  
39  
40  
41  
42  
43  
44  
45  
46  
47  
48  
49  
50  
51  
52  
53  
54  
55  
56  
57  
58  
59  
60

1  
2  
3  
4  
5  
6  
7  
8  
9  
10  
11  
12  
13  
14  
15  
16  
17  
18  
19  
20  
21  
22  
23  
24  
25  
26  
27  
28  
29  
30  
31  
32  
33  
34  
35  
36  
37  
38  
39  
40  
41  
42  
43  
44  
45  
46  
47  
48  
49  
50  
51  
52  
53  
54  
55  
56  
57  
58  
59  
60

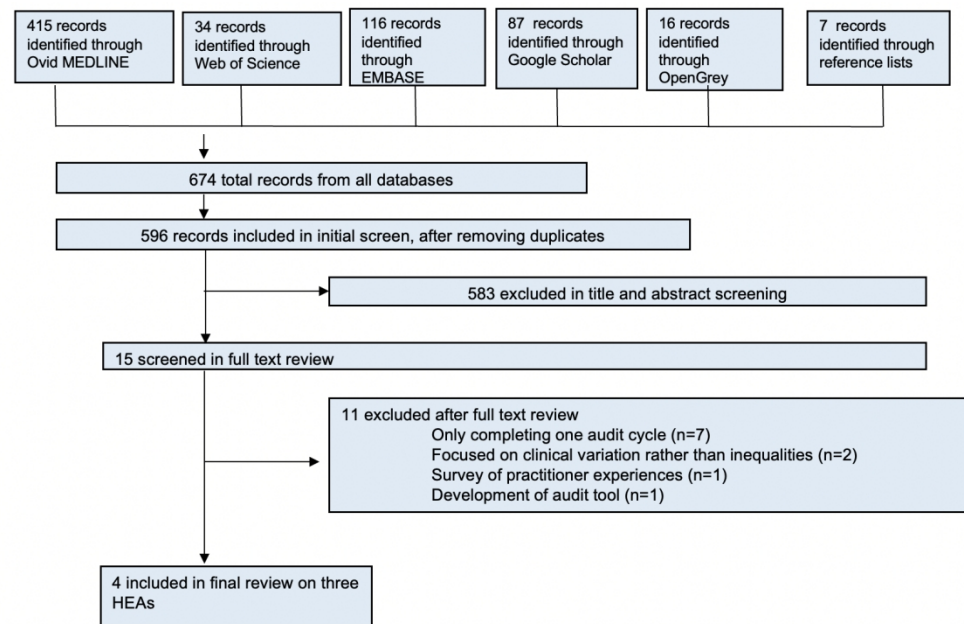

Figure 1: Study selection process

298x188mm (144 x 144 DPI)

**Supplement Material to Systematic Review on the Effectiveness of Health Equity Audits: existing evidence and call for further research.**

**Supplementary Table 1: Search Strategy**

| Database                                                                                                 | Search Strategy                                                                                                                                                                                                                                                                                                                                 |
|----------------------------------------------------------------------------------------------------------|-------------------------------------------------------------------------------------------------------------------------------------------------------------------------------------------------------------------------------------------------------------------------------------------------------------------------------------------------|
| Ovid MEDLINE(R) and Epub Ahead of Print, In-Process & Other Non-Indexed Citations, Daily and Versions(R) | (Audit*).ti. or exp *management audit/ or exp *clinical audit/<br>AND<br>(Health* adj3 (equit* or inequit* or equalit* or inequalit* or disparit* or access* or inaccess*)).ti. or (socioeconomic).ti. or exp *health services accessibility/ or exp *socioeconomic factors/ or exp *health status disparities/ or exp *healthcare disparities/ |
| Embase                                                                                                   | (Audit*).ti. or exp *management/ or exp *clinical audit/<br>AND<br>(Health* adj3 (equit* or inequit* or equalit* or inequalit* or disparit* or access* or inaccess*)).ti. or (socioeconomic).ti. or exp *health services access/ or exp *socioeconomics/ or exp *health disparity/                                                              |
| Web of Science                                                                                           | TI=(Audit*)<br>AND<br>TI=(Health* near/3 (equit* or inequit* or equalit* or inequalit* or disparit* or access* or inaccess*)) or TI=(socioeconomic)                                                                                                                                                                                             |
| OpenGrey                                                                                                 | Health* equi* audit<br>health* inequali* audit<br>health* disparit* audit<br>health* inaccessibility audit<br>health* accessibility audit                                                                                                                                                                                                       |
| Google                                                                                                   | allintitle: audit "healthcare inequalities" filetype:pdf<br>allintitle: audit "healthcare disparities" filetype:pdf<br>allintitle: audit "healthcare inaccessibility" filetype:pdf<br>allintitle: audit "health equity" filetype:pdf<br>allintitle: audit "health inequalities" filetype:pdf                                                    |

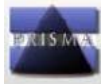

## PRISMA 2020 Checklist

| Section and Topic             | Item # | Checklist item                                                                                                                                                                                                                                                                                       | Location where item is reported |
|-------------------------------|--------|------------------------------------------------------------------------------------------------------------------------------------------------------------------------------------------------------------------------------------------------------------------------------------------------------|---------------------------------|
| <b>TITLE</b>                  |        |                                                                                                                                                                                                                                                                                                      |                                 |
| Title                         | 1      | Identify the report as a systematic review.                                                                                                                                                                                                                                                          | Page 1                          |
| <b>ABSTRACT</b>               |        |                                                                                                                                                                                                                                                                                                      |                                 |
| Abstract                      | 2      | See the PRISMA 2020 for Abstracts checklist.                                                                                                                                                                                                                                                         | Page 2                          |
| <b>INTRODUCTION</b>           |        |                                                                                                                                                                                                                                                                                                      |                                 |
| Rationale                     | 3      | Describe the rationale for the review in the context of existing knowledge.                                                                                                                                                                                                                          | Page 4-5                        |
| Objectives                    | 4      | Provide an explicit statement of the objective(s) or question(s) the review addresses.                                                                                                                                                                                                               | Page 5                          |
| <b>METHODS</b>                |        |                                                                                                                                                                                                                                                                                                      |                                 |
| Eligibility criteria          | 5      | Specify the inclusion and exclusion criteria for the review and how studies were grouped for the syntheses.                                                                                                                                                                                          | Page 6                          |
| Information sources           | 6      | Specify all databases, registers, websites, organisations, reference lists and other sources searched or consulted to identify studies. Specify the date when each source was last searched or consulted.                                                                                            | Page 6                          |
| Search strategy               | 7      | Present the full search strategies for all databases, registers and websites, including any filters and limits used.                                                                                                                                                                                 | Supplement materials table 1    |
| Selection process             | 8      | Specify the methods used to decide whether a study met the inclusion criteria of the review, including how many reviewers screened each record and each report retrieved, whether they worked independently, and if applicable, details of automation tools used in the process.                     | Page 6-7                        |
| Data collection process       | 9      | Specify the methods used to collect data from reports, including how many reviewers collected data from each report, whether they worked independently, any processes for obtaining or confirming data from study investigators, and if applicable, details of automation tools used in the process. | Page 6-7                        |
| Data items                    | 10a    | List and define all outcomes for which data were sought. Specify whether all results that were compatible with each outcome domain in each study were sought (e.g. for all measures, time points, analyses), and if not, the methods used to decide which results to collect.                        | Page 6-7                        |
|                               | 10b    | List and define all other variables for which data were sought (e.g. participant and intervention characteristics, funding sources). Describe any assumptions made about any missing or unclear information.                                                                                         | Page 6-7                        |
| Study risk of bias assessment | 11     | Specify the methods used to assess risk of bias in the included studies, including details of the tool(s) used, how many reviewers assessed each study and whether they worked independently, and if applicable, details of automation tools used in the process.                                    | Page 7                          |
| Effect measures               | 12     | Specify for each outcome the effect measure(s) (e.g. risk ratio, mean difference) used in the synthesis or presentation of results.                                                                                                                                                                  | Page 10-12                      |
| Synthesis methods             | 13a    | Describe the processes used to decide which studies were eligible for each synthesis (e.g. tabulating the study intervention characteristics and comparing against the planned groups for each synthesis (item #5)).                                                                                 | Page 6-7                        |
|                               | 13b    | Describe any methods required to prepare the data for presentation or synthesis, such as handling of missing summary statistics, or data conversions.                                                                                                                                                | Page 6-7                        |
|                               | 13c    | Describe any methods used to tabulate or visually display results of individual studies and syntheses.                                                                                                                                                                                               | Page 6-7                        |
|                               | 13d    | Describe any methods used to synthesize results and provide a rationale for the choice(s). If meta-analysis was performed, describe the model(s), method(s) to identify the presence and extent of statistical heterogeneity, and software package(s) used.                                          | Page 6-7                        |
|                               | 13e    | Describe any methods used to explore possible causes of heterogeneity among study results (e.g. subgroup analysis, meta-regression).                                                                                                                                                                 | NA / Page 7                     |
|                               | 13f    | Describe any sensitivity analyses conducted to assess robustness of the synthesized results.                                                                                                                                                                                                         | NA / Page 7                     |
| Reporting bias assessment     | 14     | Describe any methods used to assess risk of bias due to missing results in a synthesis (arising from reporting biases).                                                                                                                                                                              | Page 7                          |



## PRISMA 2020 Checklist

| Section and Topic             | Item # | Checklist item                                                                                                                                                                                                                                                                       | Location where item is reported |
|-------------------------------|--------|--------------------------------------------------------------------------------------------------------------------------------------------------------------------------------------------------------------------------------------------------------------------------------------|---------------------------------|
| Certainty assessment          | 15     | Describe any methods used to assess certainty (or confidence) in the body of evidence for an outcome.                                                                                                                                                                                | Page 7                          |
| <b>RESULTS</b>                |        |                                                                                                                                                                                                                                                                                      |                                 |
| Study selection               | 16a    | Describe the results of the search and selection process, from the number of records identified in the search to the number of studies included in the review, ideally using a flow diagram.                                                                                         | Page 8 / Figure 1               |
|                               | 16b    | Cite studies that might appear to meet the inclusion criteria, but which were excluded, and explain why they were excluded.                                                                                                                                                          | Page 8                          |
| Study characteristics         | 17     | Cite each included study and present its characteristics.                                                                                                                                                                                                                            | Page 9-13                       |
| Risk of bias in studies       | 18     | Present assessments of risk of bias for each included study.                                                                                                                                                                                                                         | Page 13                         |
| Results of individual studies | 19     | For all outcomes, present, for each study: (a) summary statistics for each group (where appropriate) and (b) an effect estimate and its precision (e.g. confidence/credible interval), ideally using structured tables or plots.                                                     | Page 10-11                      |
| Results of syntheses          | 20a    | For each synthesis, briefly summarise the characteristics and risk of bias among contributing studies.                                                                                                                                                                               | Page 15                         |
|                               | 20b    | Present results of all statistical syntheses conducted. If meta-analysis was done, present for each the summary estimate and its precision (e.g. confidence/credible interval) and measures of statistical heterogeneity. If comparing groups, describe the direction of the effect. | NA (Page 7)                     |
|                               | 20c    | Present results of all investigations of possible causes of heterogeneity among study results.                                                                                                                                                                                       | NA (Page 7)                     |
|                               | 20d    | Present results of all sensitivity analyses conducted to assess the robustness of the synthesized results.                                                                                                                                                                           | NA (Page 7)                     |
| Reporting biases              | 21     | Present assessments of risk of bias due to missing results (arising from reporting biases) for each synthesis assessed.                                                                                                                                                              | NA (Page 7)                     |
| Certainty of evidence         | 22     | Present assessments of certainty (or confidence) in the body of evidence for each outcome assessed.                                                                                                                                                                                  | NA (Page 7)                     |
| <b>DISCUSSION</b>             |        |                                                                                                                                                                                                                                                                                      |                                 |
| Discussion                    | 23a    | Provide a general interpretation of the results in the context of other evidence.                                                                                                                                                                                                    | Page 15                         |
|                               | 23b    | Discuss any limitations of the evidence included in the review.                                                                                                                                                                                                                      | Page 18-19                      |
|                               | 23c    | Discuss any limitations of the review processes used.                                                                                                                                                                                                                                | Page 18-19                      |
|                               | 23d    | Discuss implications of the results for practice, policy, and future research.                                                                                                                                                                                                       | Page 19-20                      |
| <b>OTHER INFORMATION</b>      |        |                                                                                                                                                                                                                                                                                      |                                 |
| Registration and protocol     | 24a    | Provide registration information for the review, including register name and registration number, or state that the review was not registered.                                                                                                                                       | Page 6                          |
|                               | 24b    | Indicate where the review protocol can be accessed, or state that a protocol was not prepared.                                                                                                                                                                                       | Page 6                          |
|                               | 24c    | Describe and explain any amendments to information provided at registration or in the protocol.                                                                                                                                                                                      | NA                              |
| Support                       | 25     | Describe sources of financial or non-financial support for the review, and the role of the funders or sponsors in the review.                                                                                                                                                        | Page 1                          |
| Competing                     | 26     | Declare any competing interests of review authors. <a href="http://bmjopen.bmj.com/site/about/guidelines.xhtml">http://bmjopen.bmj.com/site/about/guidelines.xhtml</a>                                                                                                               | Page 1                          |

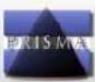

# PRISMA 2020 Checklist

1  
2  
3  
4  
5  
6  
7  
8  
9  
10  
11  
12  
13  
14  
15  
16  
17  
18  
19  
20  
21  
22  
23  
24  
25  
26  
27  
28  
29  
30  
31  
32  
33  
34  
35  
36  
37  
38  
39  
40  
41  
42  
43  
44  
45  
46  
47

| Section and Topic                              | Item # | Checklist item                                                                                                                                                                                                                             | Location where item is reported |
|------------------------------------------------|--------|--------------------------------------------------------------------------------------------------------------------------------------------------------------------------------------------------------------------------------------------|---------------------------------|
| interests                                      |        |                                                                                                                                                                                                                                            |                                 |
| Availability of data, code and other materials | 27     | Report which of the following are publicly available and where they can be found: template data collection forms; data extracted from included studies; data used for all analyses; analytic code; any other materials used in the review. | Page 1                          |

From: Page MJ, McKenzie JE, Bossuyt PM, Boutron I, Hoffmann TC, Mulrow CD, et al. The PRISMA 2020 statement: an updated guideline for reporting systematic reviews. *BMJ* 2021;372:n71. doi: 10.1136/bmj.n71  
 For more information, visit: <http://www.prisma-statement.org/>

For peer review only
