# Supplementary material for: Health equity audits: a systematic review of the effectiveness
Source: PubMed Central journal article supplement (PMC8587574; doi:10.1136/bmjopen-2021-053392), 2021-11-11
Supplement: bmjopen-2021-053392supp001.pdf [file bmjopen-2021-053392supp001.pdf]

**Supplement Material to Systematic Review on the Effectiveness of Health Equity Audits: existing evidence and call for further research.**

**Supplementary Table 1: Search Strategy**

| Database                                                                                                 | Search Strategy                                                                                                                                                                                                                                                                                                                                 |
|----------------------------------------------------------------------------------------------------------|-------------------------------------------------------------------------------------------------------------------------------------------------------------------------------------------------------------------------------------------------------------------------------------------------------------------------------------------------|
| Ovid MEDLINE(R) and Epub Ahead of Print, In-Process & Other Non-Indexed Citations, Daily and Versions(R) | (Audit*).ti. or exp *management audit/ or exp *clinical audit/<br>AND<br>(Health* adj3 (equit* or inequit* or equalit* or inequalit* or disparit* or access* or inaccess*)).ti. or (socioeconomic).ti. or exp *health services accessibility/ or exp *socioeconomic factors/ or exp *health status disparities/ or exp *healthcare disparities/ |
| Embase                                                                                                   | (Audit*).ti. or exp *management/ or exp *clinical audit/<br>AND<br>(Health* adj3 (equit* or inequit* or equalit* or inequalit* or disparit* or access* or inaccess*)).ti. or (socioeconomic).ti. or exp *health services access/ or exp *socioeconomics/ or exp *health disparity/                                                              |
| Web of Science                                                                                           | TI=(Audit*)<br>AND<br>TI=(Health* near/3 (equit* or inequit* or equalit* or inequalit* or disparit* or access* or inaccess*)) or TI=(socioeconomic)                                                                                                                                                                                             |
| OpenGrey                                                                                                 | Health* equi* audit<br>health* inequali* audit<br>health* disparit* audit<br>health* inaccessibility audit<br>health* accessibility audit                                                                                                                                                                                                       |
| Google                                                                                                   | allintitle: audit "healthcare inequalities" filetype:pdf<br>allintitle: audit "healthcare disparities" filetype:pdf<br>allintitle: audit "healthcare inaccessibility" filetype:pdf<br>allintitle: audit "health equity" filetype:pdf<br>allintitle: audit "health inequalities" filetype:pdf                                                    |
